# Supplementary material for: Measurement report: Stoichiometry of dissolved iron and aluminum as an indicator of the factors controlling the fractional solubility of aerosol iron: Results of the annual observations of size-fractionated aerosol particles in Japan
Source: Copernicus journal article supplement (doi:10.5194/acp-2023-20), 2023-03-23
Supplement: Supplementary file 1 [file acp-2023-20-supplement.pdf]

Supporting Information for

## **Stoichiometry of dissolved iron and aluminum as an indicator of the factors controlling the fractional solubility of aerosol iron: results of the annual observations of size-fractionated aerosol particles in Japan**

Kohei Sakata<sup>1\*</sup>, Aya Sakaguchi<sup>2</sup>, Yoshiaki Yamakawa<sup>3</sup>, Chihiro Miyamoto<sup>3</sup>, Minako Kurisu<sup>4</sup>, Yoshio Takahashi<sup>4</sup>

<sup>1</sup>Earth System Division, National Institute for Environmental Studies, 16-2 Onogawa, Tsukuba, Ibaraki 305-8506, Japan

<sup>2</sup>Faculty of Pure and Applied Science, University of Tsukuba, 1-1-1 Tennodai, Tsukuba, Ibaraki 305-8571, Japan

<sup>3</sup>Graduate School of Science, the University of Tokyo, 7-3-1 Hongo, Bunkyo-ku, Tokyo, 113-0033, Japan

<sup>4</sup>Research Institute for Marine Resources Utilization, Japan Agency for Marine-Earth Science and Technology, 2-15 Natsuhshima-cho, Yokosuka, Kanagawa 237-0061, Japan

*Correspondence to:* Kohei Sakata ([sakata.kohei@nies.go.jp](mailto:sakata.kohei@nies.go.jp))

## Supplemental Figures

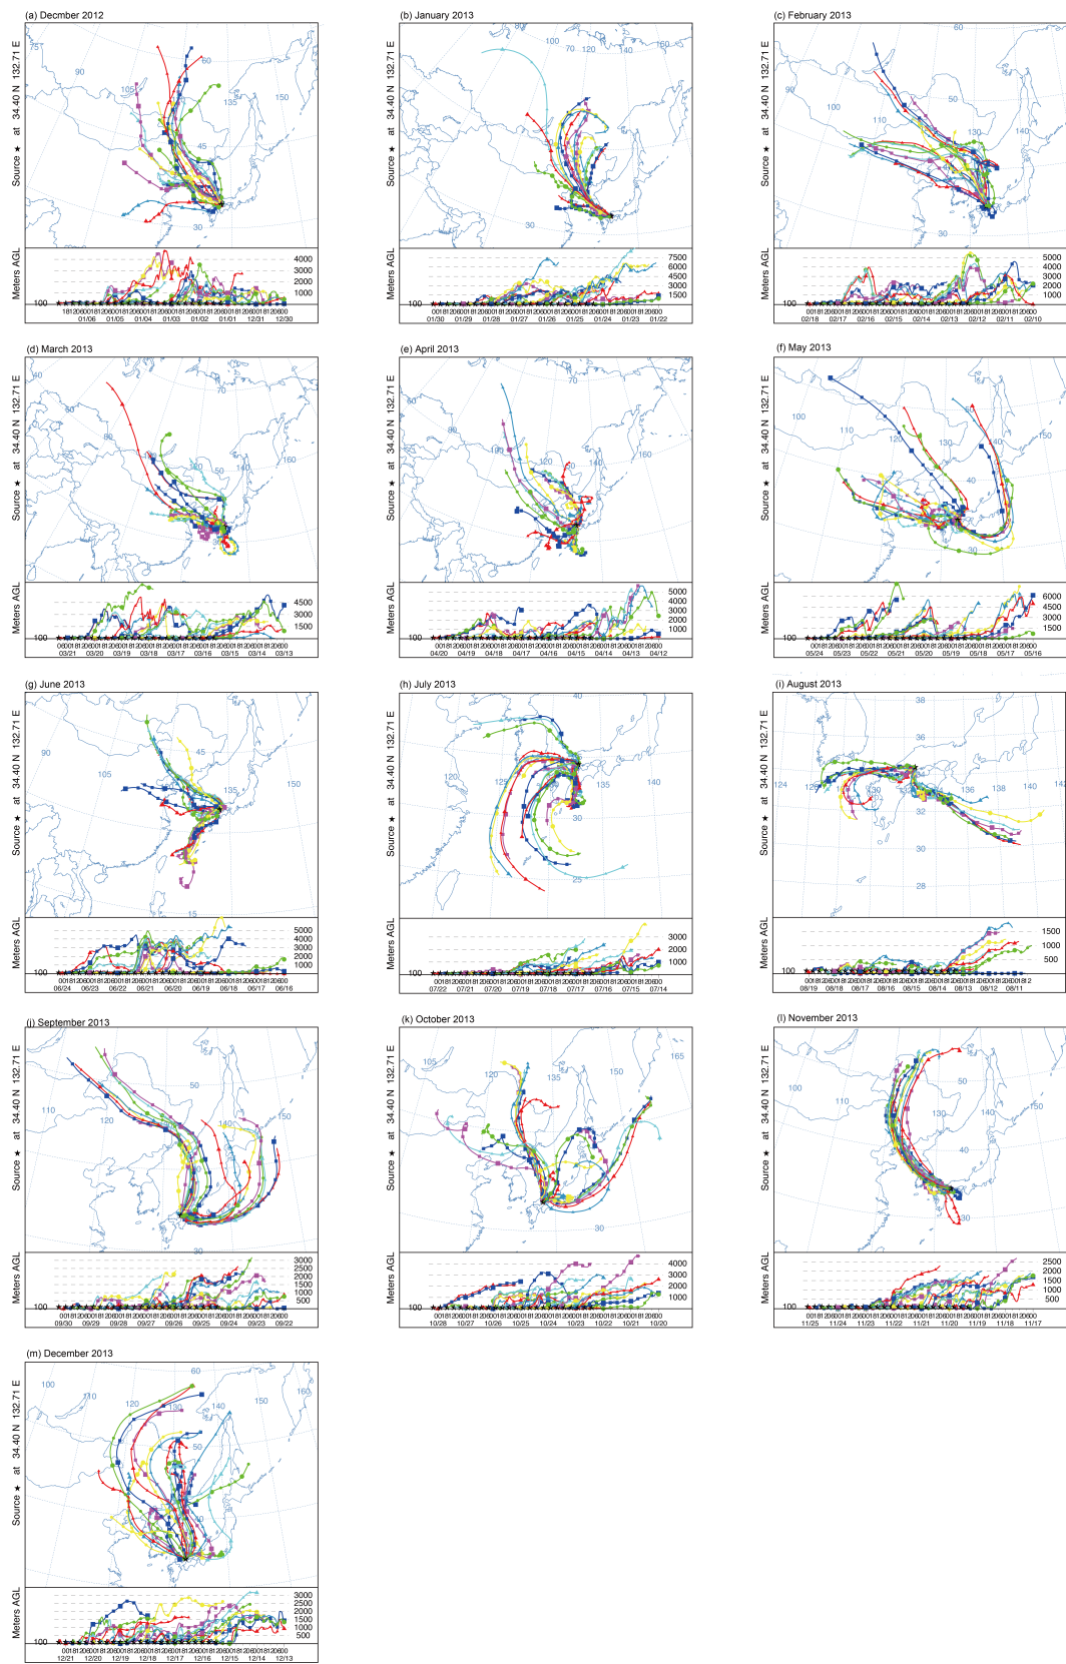

Figure S1: Backward trajectories of sampling periods of (a) December 2012, (b-m) January to December 2013.

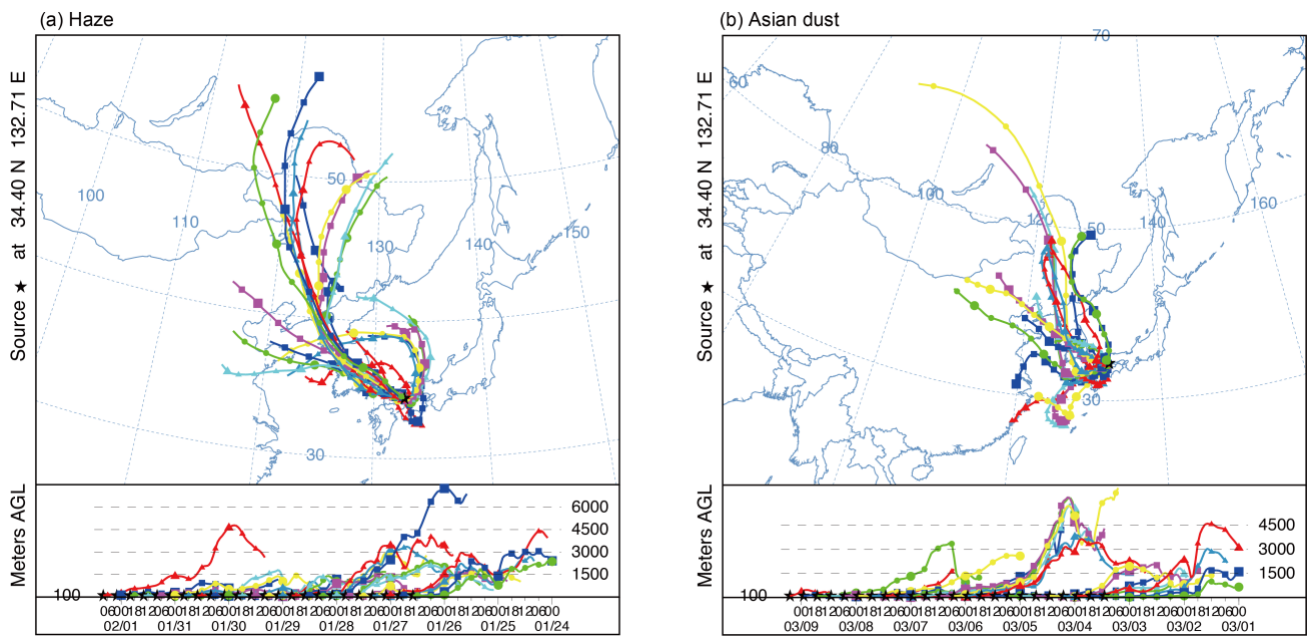

Figure S2: Backward trajectories of sampling periods of (a) Haze and (b) Asian dust events.

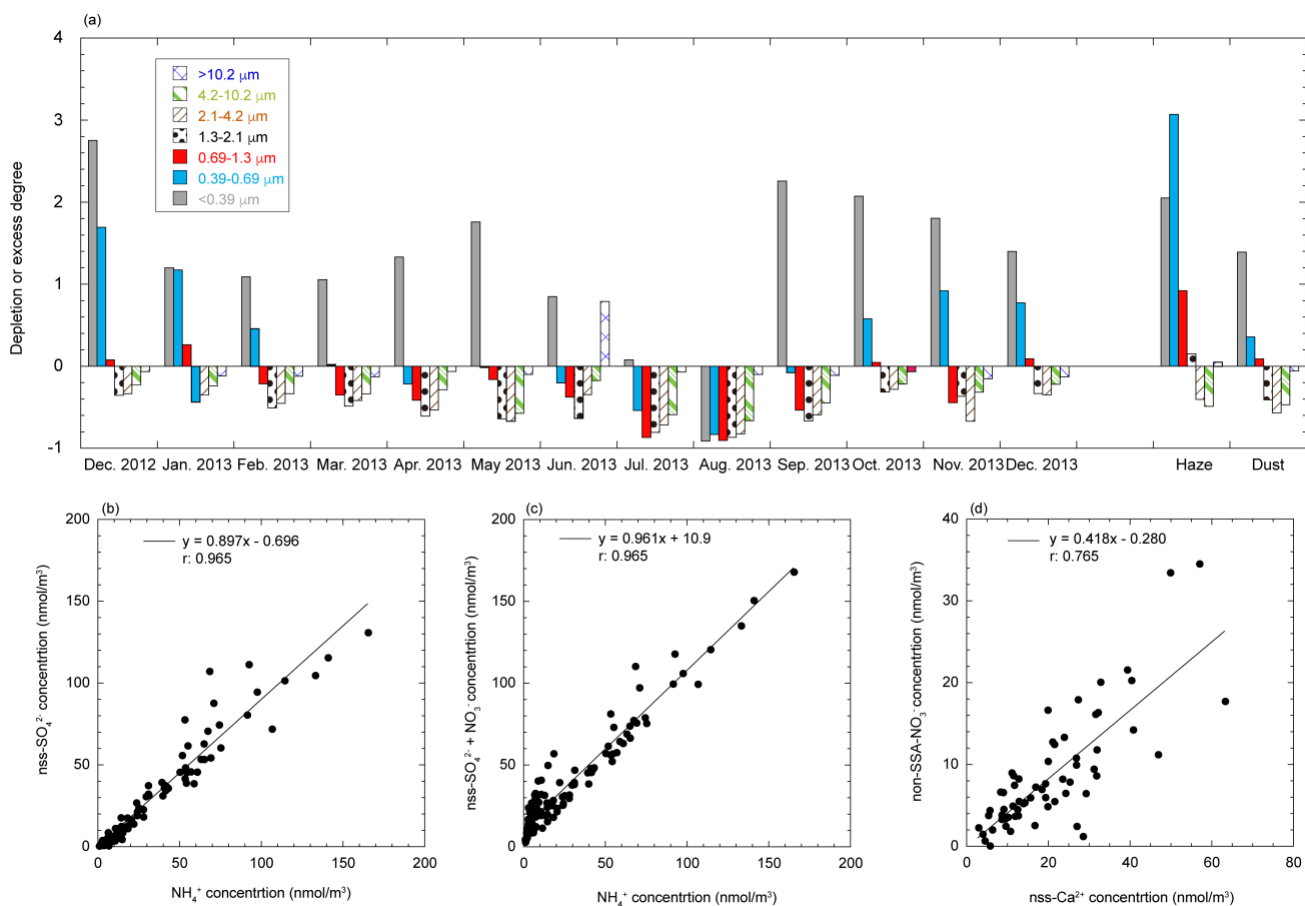

Figure S3: (a) depletion and excess degree of Cl<sup>-</sup> in aerosol particles. Depletion and excess degree was calculated

by  $\frac{(Cl^-/Na^+)_{aerosol}}{(Cl^-/Na^+)_{seawater}} - 1$ . (b and c) scatter plots of [NH<sub>4</sub><sup>+</sup>] concentration with [nss-SO<sub>4</sub><sup>2-</sup>] and [nss-SO<sub>4</sub><sup>2-</sup>]+[NO<sub>3</sub><sup>-</sup>]. (d) A scatter plot between [nss-Ca<sup>2+</sup>] and [non-SSA-NO<sub>3</sub><sup>-</sup>].

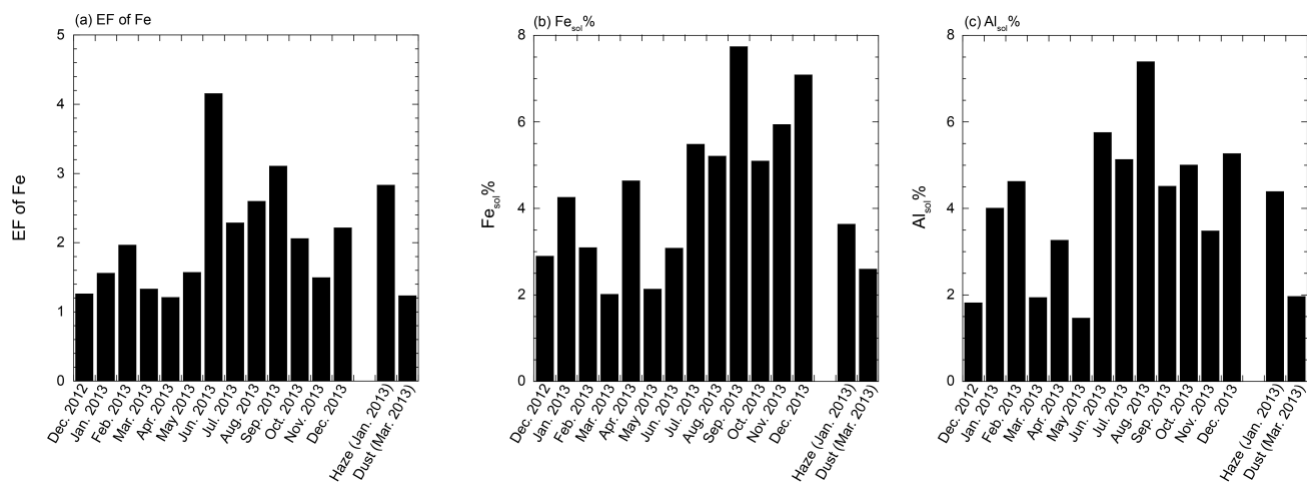

Figure S4: Monthly variations of (a) EF of Fe, (b) Fe<sub>sol</sub>%, and (c) Al<sub>sol</sub>% in TSP.

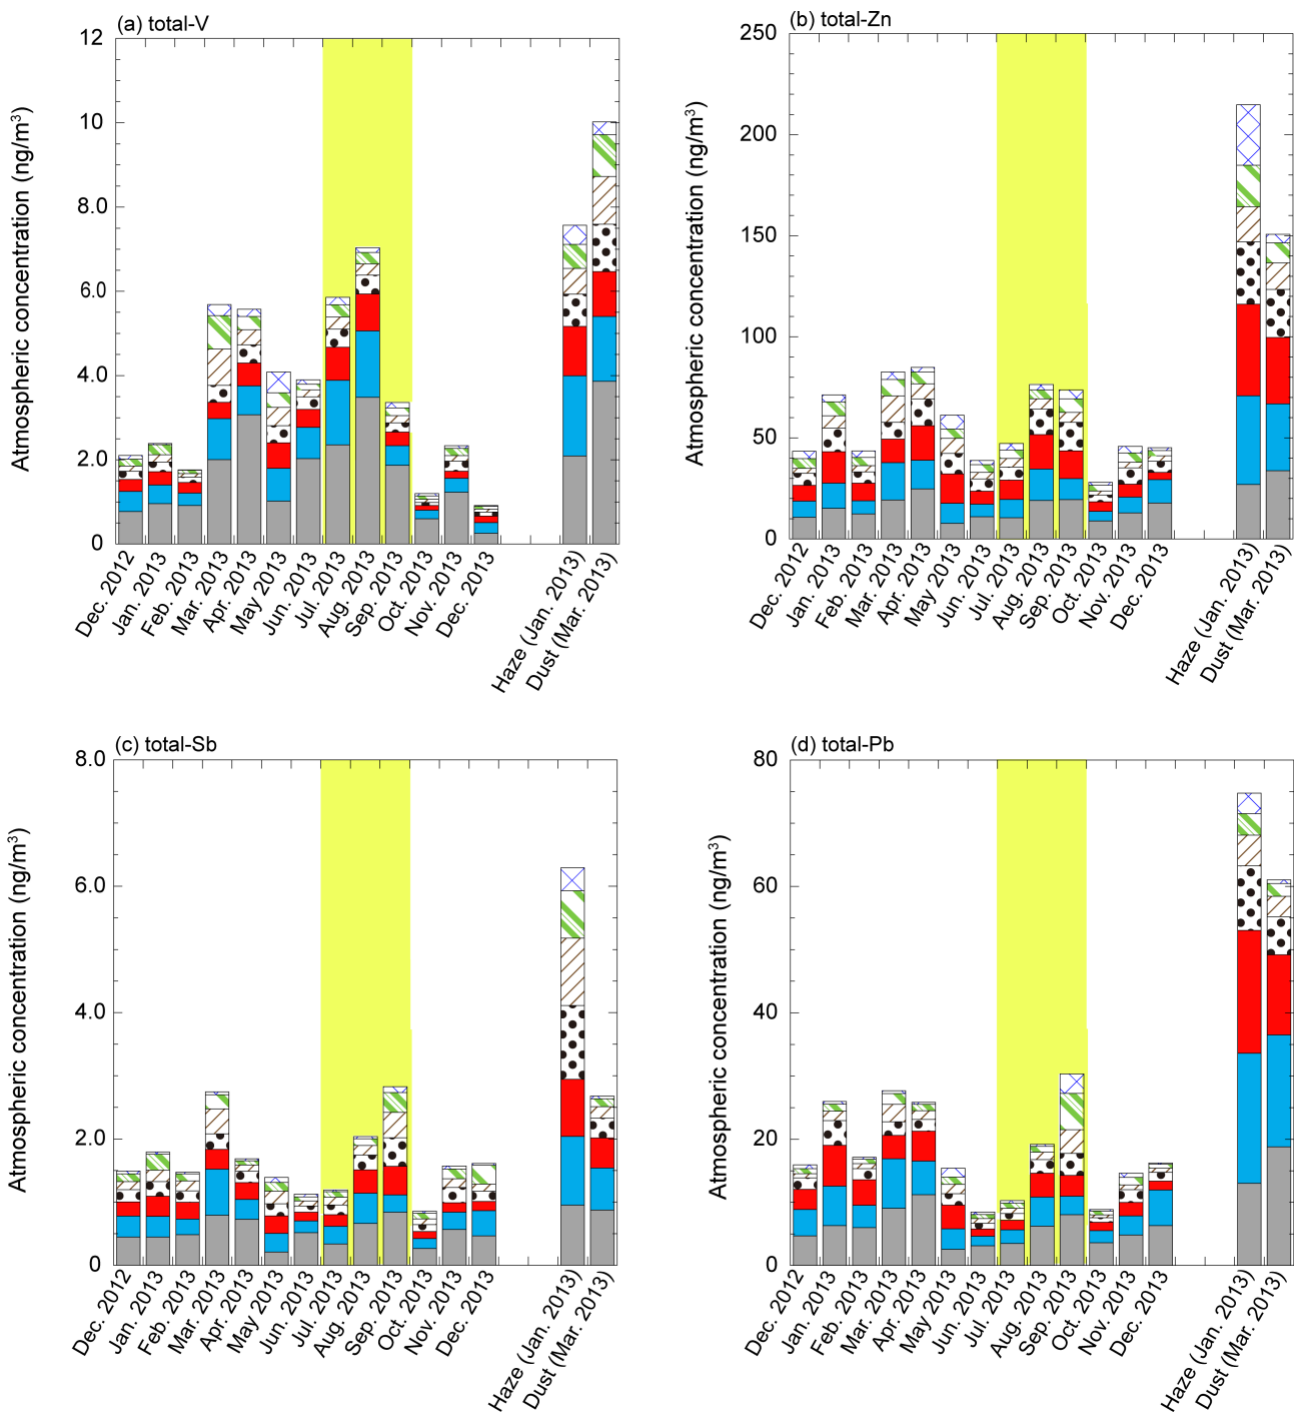

Figure S5: Monthly variation of (a) V, (b) Zn, (c) Sb, and (d) Pb concentrations in size-fractionated aerosol particles. Yellow shaded region shows the sampling period when air mass was derived from the Seto Inland Sea.

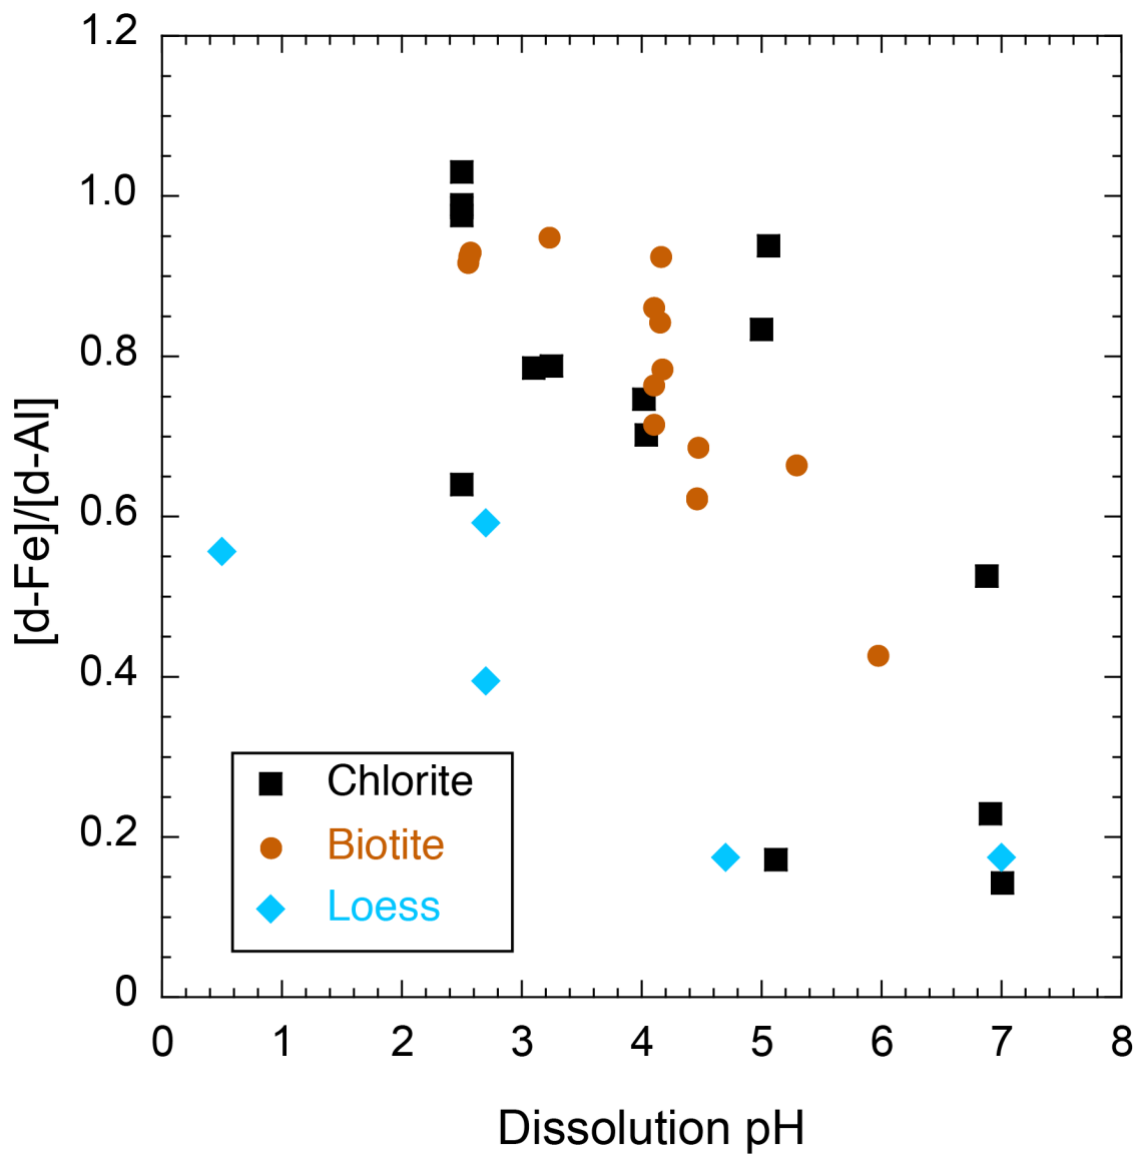

Figure S6: pH dependence of [d-Fe]/[d-Al] ratio of aluminosilicate and loess during proton-promoted dissolution. These [d-Fe]/[d-Al] ratios were referred from Kodama and Schnitzer (1973), Desboeufs et al. (2001), Lowson et al. (2005), and Bray et al. (2015).

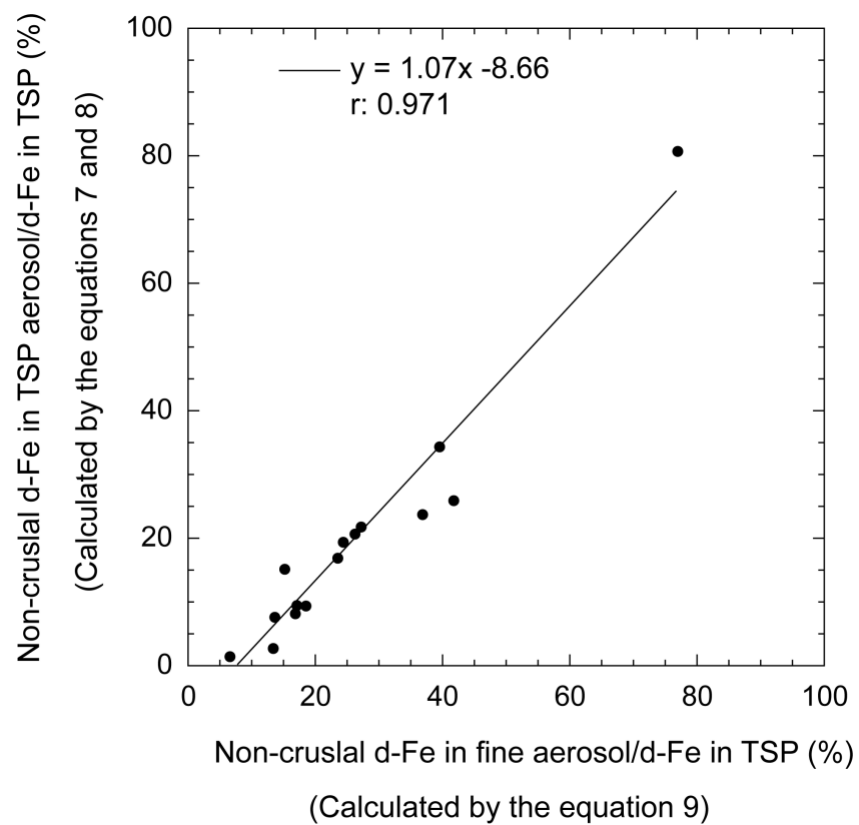

Figure S7: Comparison of the calculation results of relative abundance on non-crystal



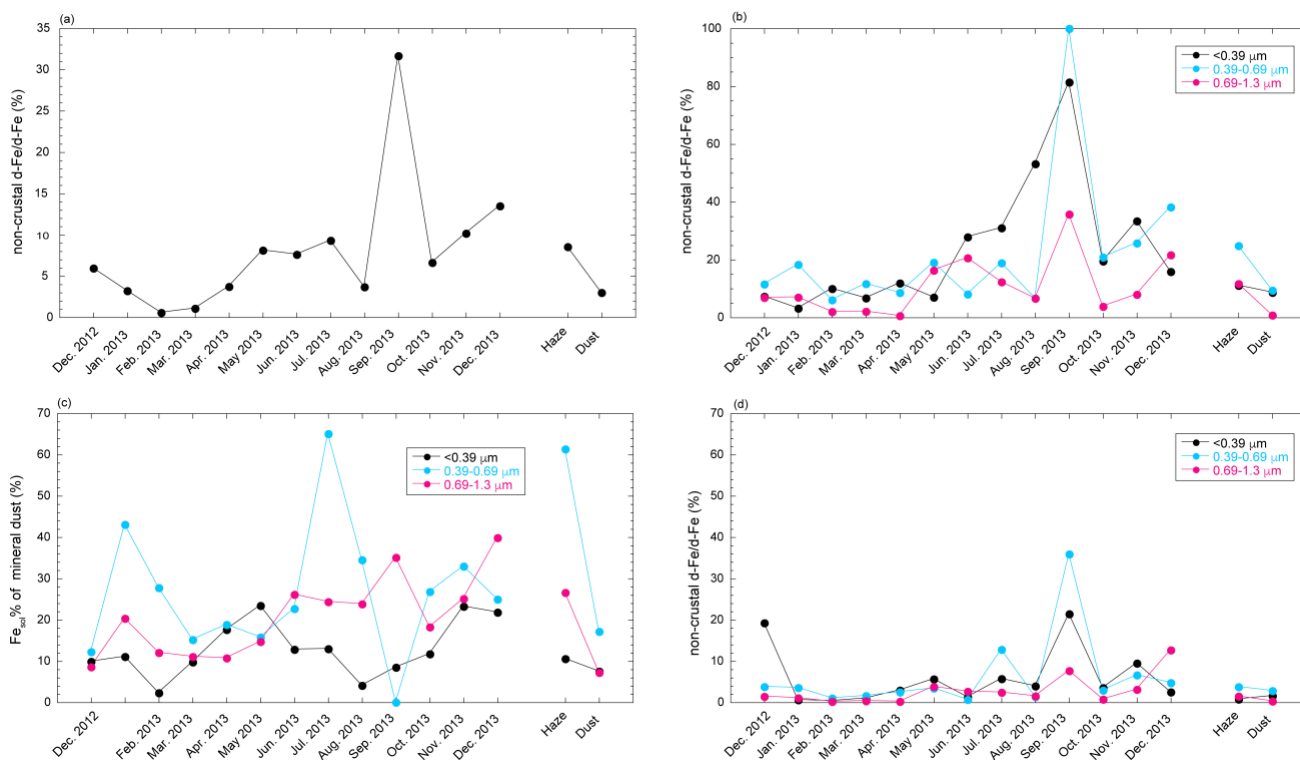

Figure S8: Relative abundance of pyrogenic Fe to d-Fe in (a) TSP and (b) fine aerosol particles when [d-Fe]/[d-Al] ratio of non-crystal Fe is 4.67. (c) crustal Fe and (d) pyrogenic Fe when [d-Fe]/[d-Al] ratio of pyrogenic Fe.

Table S1 Sampling information for each sapling period.

| Sample name    | Sampling period     |                     | Total flow<br>m <sup>3</sup> |
|----------------|---------------------|---------------------|------------------------------|
|                | Start               | End                 |                              |
|                | Non-dust event      |                     |                              |
| December 2012  | 11:30, 25 Dec. 2012 | 9:20, 7 Jan. 2013   | 11699.5                      |
| January 2013   | 10:40, 21 Jan. 2013 | 13:29, 30 Jan. 2013 | 7624.5                       |
| February 2013  | 10:31, 4 Feb. 2013  | 10:52, 18 Feb. 2013 | 11740.6                      |
| March 2013     | 17:20, 21 Mar. 2013 | 17:20, 21 Mar. 2013 | 9850.1                       |
| April 2013     | 11:38, 8 Apr. 2013  | 14:30, 20 Apr. 2013 | 9494.7                       |
| May 2013       | 13:45, 13 May, 2013 | 14:52, 24 May, 2013 | 9282.3                       |
| June 2013      | 15:00, 11 Jun. 2013 | 12:16, 24 Jun. 2013 | 11477.6                      |
| July 2013      | 14:25, 8 Jul. 2013  | 13:00, 22 Jul. 2013 | 11461.2                      |
| August 2013    | 11:45, 6 Aug. 2013  | 11:25, 19 Aug. 2013 | 11490.1                      |
| September 2013 | 16:25, 17 Sep. 2013 | 12:40, 30 Sep. 2013 | 11386.3                      |
| October 2013   | 14:40, 15 Oct. 2013 | 13:10, 28 Oct. 2013 | 11544.3                      |
| November 2013  | 10:45, 12 Nov. 2013 | 11:05, 25 Nov. 2013 | 11698.3                      |
| December 2013  | 9:30, 7 Dec. 2013   | 14:40, 21 Dec. 2013 | 11838.8                      |
|                | Dust events         |                     |                              |
| Haze           | 14:19, 31 Jan. 2013 | 17:09, 1 Feb. 2013  | 936.8                        |
| Dust           | 10:30, 4 Mar. 2013  | 14:30, 9 Mar. 2013  | 4840.2                       |

Table S2. Major ion concentration (neq/m<sup>3</sup>) in size-fractionated aerosol samples.

|            | Diameter<br>μm | Na <sup>+</sup><br>neq/m <sup>3</sup> | NH <sub>4</sub> <sup>+</sup><br>neq/m <sup>3</sup> | K <sup>+</sup><br>neq/m <sup>3</sup> | Mg <sup>2+</sup><br>neq/m <sup>3</sup> | Ca <sup>2+</sup><br>neq/m <sup>3</sup> | Cl <sup>-</sup><br>neq/m <sup>3</sup> | NO <sub>3</sub><br>neq/m <sup>3</sup> | SO <sub>4</sub> <sup>2-</sup><br>neq/m <sup>3</sup> |
|------------|----------------|---------------------------------------|----------------------------------------------------|--------------------------------------|----------------------------------------|----------------------------------------|---------------------------------------|---------------------------------------|-----------------------------------------------------|
| Dec., 2012 | <0.39          | 0.534                                 | 41.1                                               | 0.962                                | 0.158                                  | 0.695                                  | 2.35                                  | 10.4                                  | 37.6                                                |
|            | 0.39-0.69      | 0.433                                 | 24.1                                               | 0.519                                | 0.126                                  | 0.347                                  | 1.36                                  | 6.42                                  | 19.2                                                |
|            | 0.69-1.3       | 1.12                                  | 20.4                                               | 0.497                                | 0.316                                  | 0.651                                  | 1.41                                  | 6.72                                  | 14.9                                                |
|            | 1.3-2.1        | 2.74                                  | 5.07                                               | 0.176                                | 0.656                                  | 1.24                                   | 2.07                                  | 4.96                                  | 3.66                                                |
|            | 2.1-4.2        | 5.26                                  | 3.39                                               | 0.142                                | 1.14                                   | 2.47                                   | 4.10                                  | 6.59                                  | 2.52                                                |
|            | 4.2-10.2       | 10.2                                  | 1.75                                               | 0.179                                | 1.79                                   | 3.86                                   | 9.18                                  | 6.03                                  | 2.59                                                |
|            | >10.2          | 8.11                                  | 1.38                                               | 0.120                                | 1.21                                   | 1.91                                   | 8.87                                  | 2.11                                  | 1.87                                                |
| Jan., 2013 | <0.39          | 1.94                                  | 54.1                                               | 1.55                                 | 0.908                                  | 3.69                                   | 4.98                                  | 13.1                                  | 39.2                                                |
|            | 0.39-0.69      | 1.00                                  | 56.9                                               | 1.29                                 | 0.304                                  | 0.593                                  | 2.55                                  | 11.7                                  | 46.0                                                |
|            | 0.69-1.3       | 2.19                                  | 53.4                                               | 1.33                                 | 0.682                                  | 1.09                                   | 3.24                                  | 14.2                                  | 42.0                                                |
|            | 1.3-2.1        | 7.85                                  | 28.0                                               | 0.630                                | 1.66                                   | 2.51                                   | 5.18                                  | 12.6                                  | 19.2                                                |
|            | 2.1-4.2        | 11.2                                  | 10.6                                               | 0.281                                | 2.45                                   | 3.57                                   | 8.52                                  | 12.3                                  | 6.98                                                |
|            | 4.2-10.2       | 13.3                                  | 5.41                                               | 0.211                                | 2.54                                   | 3.26                                   | 11.8                                  | 9.26                                  | 3.57                                                |
|            | >10.2          | 21.3                                  | 3.43                                               | 0.292                                | 3.56                                   | 3.97                                   | 21.9                                  | 5.43                                  | 4.15                                                |
| Feb., 2013 | <0.39          | 1.04                                  | 65.2                                               | 1.53                                 | 0.384                                  | 1.99                                   | 2.53                                  | 13.0                                  | 53.6                                                |
|            | 0.39-0.69      | 1.15                                  | 50.2                                               | 1.79                                 | 0.405                                  | 0.538                                  | 1.97                                  | 11.4                                  | 45.8                                                |
|            | 0.69-1.3       | 2.65                                  | 43.1                                               | 1.63                                 | 0.886                                  | 0.979                                  | 2.43                                  | 12.3                                  | 36.1                                                |
|            | 1.3-2.1        | 7.54                                  | 17.6                                               | 0.669                                | 1.99                                   | 2.22                                   | 4.35                                  | 12.3                                  | 12.9                                                |
|            | 2.1-4.2        | 11.9                                  | 7.43                                               | 0.324                                | 2.79                                   | 3.57                                   | 7.61                                  | 13.2                                  | 5.19                                                |
|            | 4.2-10.2       | 14.2                                  | 4.28                                               | 0.298                                | 3.05                                   | 3.37                                   | 11.1                                  | 10.9                                  | 3.36                                                |
|            | >10.2          | 11.5                                  | 2.00                                               | 0.182                                | 2.05                                   | 2.74                                   | 11.8                                  | 3.65                                  | 2.71                                                |
| Mar., 2013 | <0.39          | 2.11                                  | 75.2                                               | 1.75                                 | 0.621                                  | 2.73                                   | 5.07                                  | 14.8                                  | 60.7                                                |
|            | 0.39-0.69      | 2.15                                  | 64.9                                               | 1.83                                 | 0.656                                  | 1.52                                   | 2.59                                  | 10.7                                  | 63.2                                                |
|            | 0.69-1.3       | 4.14                                  | 40.7                                               | 1.12                                 | 1.51                                   | 3.12                                   | 3.14                                  | 10.2                                  | 36.6                                                |
|            | 1.3-2.1        | 7.68                                  | 14.4                                               | 0.496                                | 2.33                                   | 4.30                                   | 4.63                                  | 10.9                                  | 13.4                                                |
|            | 2.1-4.2        | 25.1                                  | 10.8                                               | 1.62                                 | 7.22                                   | 17.3                                   | 17.1                                  | 26.5                                  | 14.3                                                |
|            | 4.2-10.2       | 29.9                                  | 8.88                                               | 0.728                                | 8.00                                   | 17.8                                   | 23.1                                  | 32.1                                  | 8.27                                                |
|            | >10.2          | 23.5                                  | 2.67                                               | 0.425                                | 5.20                                   | 12.5                                   | 23.9                                  | 10.8                                  | 6.11                                                |
| Apr., 2013 | <0.39          | 2.17                                  | 114                                                | 2.88                                 | 1.46                                   | 7.16                                   | 5.92                                  | 18.9                                  | 102                                                 |
|            | 0.39-0.69      | 1.56                                  | 53.6                                               | 1.46                                 | 0.711                                  | 2.00                                   | 1.43                                  | 7.80                                  | 48.5                                                |
|            | 0.69-1.3       | 3.28                                  | 42.6                                               | 1.49                                 | 1.75                                   | 4.36                                   | 2.25                                  | 11.1                                  | 36.7                                                |
|            | 1.3-2.1        | 8.88                                  | 15.2                                               | 0.550                                | 3.16                                   | 7.23                                   | 4.07                                  | 17.1                                  | 9.72                                                |
|            | 2.1-4.2        | 16.3                                  | 10.6                                               | 0.578                                | 5.41                                   | 12.4                                   | 8.91                                  | 26.5                                  | 5.64                                                |
|            | 4.2-10.2       | 23.0                                  | 7.17                                               | 0.682                                | 7.09                                   | 20.2                                   | 19.2                                  | 27.7                                  | 5.08                                                |
|            | >10.2          | 13.0                                  | 4.48                                               | 0.361                                | 3.98                                   | 10.3                                   | 14.3                                  | 8.43                                  | 3.29                                                |
| May, 2013  | <0.39          | 1.44                                  | 91.5                                               | 2.11                                 | 1.01                                   | 4.45                                   | 4.65                                  | 18.9                                  | 80.7                                                |
|            | 0.39-0.69      | 1.95                                  | 71.0                                               | 2.28                                 | 0.623                                  | 1.52                                   | 2.24                                  | 9.28                                  | 88.0                                                |
|            | 0.69-1.3       | 1.84                                  | 55.1                                               | 1.33                                 | 1.04                                   | 2.91                                   | 1.81                                  | 11.2                                  | 61.9                                                |
|            | 1.3-2.1        | 4.76                                  | 31.3                                               | 0.893                                | 2.38                                   | 6.09                                   | 1.99                                  | 14.8                                  | 32.1                                                |
|            | 2.1-4.2        | 7.12                                  | 12.8                                               | 0.556                                | 3.17                                   | 9.82                                   | 2.76                                  | 21.7                                  | 9.88                                                |
|            | 4.2-10.2       | 6.97                                  | 9.16                                               | 0.403                                | 3.04                                   | 10.8                                   | 3.47                                  | 22.6                                  | 4.70                                                |
|            | >10.2          | 3.87                                  | 4.80                                               | 0.316                                | 2.67                                   | 15.1                                   | 4.08                                  | 17.1                                  | 2.78                                                |
| Jun., 2013 | <0.39          | 0.616                                 | 41.4                                               | 0.854                                | 0.499                                  | 3.27                                   | 1.33                                  | 11.1                                  | 34.5                                                |
|            | 0.39-0.69      | 0.627                                 | 30.9                                               | 0.838                                | 0.244                                  | 0.487                                  | 0.583                                 | 5.85                                  | 32.3                                                |
|            | 0.69-1.3       | 0.961                                 | 25.1                                               | 0.630                                | 0.439                                  | 0.954                                  | 0.702                                 | 7.49                                  | 23.9                                                |
|            | 1.3-2.1        | 2.23                                  | 13.0                                               | 0.458                                | 0.873                                  | 2.01                                   | 0.954                                 | 7.63                                  | 11.7                                                |
|            | 2.1-4.2        | 2.54                                  | 6.58                                               | 0.534                                | 0.995                                  | 2.87                                   | 1.95                                  | 9.28                                  | 3.48                                                |
|            | 4.2-10.2       | 2.18                                  | 5.20                                               | 0.367                                | 0.974                                  | 3.88                                   | 2.10                                  | 9.11                                  | 2.37                                                |
|            | >10.2          | 0.231                                 | 1.11                                               | 0.112                                | 0.267                                  | 1.78                                   | 0.483                                 | 2.07                                  | 0.894                                               |

Table S2. Continued.

|            | Diameter<br>$\mu\text{m}$ | Na <sup>+</sup><br>neq/m <sup>3</sup> | NH <sub>4</sub> <sup>+</sup><br>neq/m <sup>3</sup> | K <sup>+</sup><br>neq/m <sup>3</sup> | Mg <sup>2+</sup><br>neq/m <sup>3</sup> | Ca <sup>2+</sup><br>neq/m <sup>3</sup> | Cl <sup>-</sup><br>neq/m <sup>3</sup> | NO <sub>3</sub><br>neq/m <sup>3</sup> | SO <sub>4</sub> <sup>2-</sup><br>neq/m <sup>3</sup> |
|------------|---------------------------|---------------------------------------|----------------------------------------------------|--------------------------------------|----------------------------------------|----------------------------------------|---------------------------------------|---------------------------------------|-----------------------------------------------------|
| Jul., 2013 | <0.39                     | 0.847                                 | 67.3                                               | 0.843                                | 0.459                                  | 3.70                                   | 1.07                                  | 6.57                                  | 70.8                                                |
|            | 0.39-0.69                 | 0.731                                 | 30.9                                               | 0.482                                | 0.165                                  | 0.428                                  | 0.394                                 | 1.95                                  | 37.5                                                |
|            | 0.69-1.3                  | 3.53                                  | 23.7                                               | 0.549                                | 0.859                                  | 1.51                                   | 0.546                                 | 3.35                                  | 27.3                                                |
|            | 1.3-2.1                   | 12.8                                  | 6.35                                               | 0.564                                | 2.72                                   | 2.79                                   | 2.88                                  | 10.3                                  | 10.2                                                |
|            | 2.1-4.2                   | 21.3                                  | 2.83                                               | 0.945                                | 4.43                                   | 4.64                                   | 7.08                                  | 17.4                                  | 6.52                                                |
|            | 4.2-10.2                  | 15.3                                  | 2.75                                               | 0.593                                | 3.14                                   | 4.56                                   | 7.30                                  | 13.1                                  | 3.59                                                |
| Aug., 2013 | >10.2                     | 2.23                                  | 1.72                                               | 0.198                                | 0.596                                  | 3.63                                   | 2.43                                  | 3.96                                  | 1.42                                                |
|            | <0.39                     | 0.969                                 | 92.6                                               | 2.13                                 | 0.234                                  | 2.24                                   | 0.0994                                | 6.43                                  | 112                                                 |
|            | 0.39-0.69                 | 1.11                                  | 68.5                                               | 2.10                                 | 0.268                                  | 0.595                                  | 0.218                                 | 2.97                                  | 107                                                 |
|            | 0.69-1.3                  | 2.35                                  | 53.2                                               | 1.86                                 | 0.693                                  | 1.50                                   | 0.262                                 | 3.41                                  | 77.9                                                |
|            | 1.3-2.1                   | 5.97                                  | 14.2                                               | 0.738                                | 1.75                                   | 3.40                                   | 0.934                                 | 8.50                                  | 18.5                                                |
|            | 2.1-4.2                   | 8.92                                  | 6.08                                               | 0.663                                | 2.55                                   | 6.13                                   | 1.85                                  | 16.8                                  | 6.70                                                |
| Sep., 2013 | 4.2-10.2                  | 6.82                                  | 5.34                                               | 0.497                                | 2.11                                   | 8.24                                   | 2.68                                  | 17.8                                  | 3.75                                                |
|            | >10.2                     | 1.22                                  | 2.71                                               | 0.318                                | 0.841                                  | 5.95                                   | 1.28                                  | 6.78                                  | 1.53                                                |
|            | <0.39                     | 0.985                                 | 63.1                                               | 2.27                                 | 0.285                                  | 1.55                                   | 3.75                                  | 15.4                                  | 53.6                                                |
|            | 0.39-0.69                 | 1.16                                  | 39.1                                               | 1.60                                 | 0.295                                  | 0.678                                  | 1.26                                  | 5.85                                  | 39.5                                                |
|            | 0.69-1.3                  | 2.62                                  | 20.5                                               | 0.689                                | 0.663                                  | 1.13                                   | 1.43                                  | 6.61                                  | 17.0                                                |
|            | 1.3-2.1                   | 10.4                                  | 10.4                                               | 0.608                                | 2.27                                   | 2.33                                   | 4.06                                  | 13.6                                  | 7.931                                               |
| Oct., 2013 | 2.1-4.2                   | 22.8                                  | 8.16                                               | 0.857                                | 5.01                                   | 5.14                                   | 10.9                                  | 25.2                                  | 5.94                                                |
|            | 4.2-10.2                  | 30.2                                  | 6.67                                               | 0.916                                | 6.26                                   | 6.03                                   | 19.5                                  | 27.6                                  | 4.26                                                |
|            | >10.2                     | 29.8                                  | 3.70                                               | 0.773                                | 6.78                                   | 10.8                                   | 31.1                                  | 16.6                                  | 4.45                                                |
|            | <0.39                     | 0.871                                 | 27.9                                               | 1.58                                 | 0.434                                  | 1.90                                   | 3.13                                  | 6.84                                  | 22.9                                                |
|            | 0.39-0.69                 | 0.628                                 | 14.5                                               | 0.759                                | 0.213                                  | 0.392                                  | 1.16                                  | 2.95                                  | 12.5                                                |
|            | 0.69-1.3                  | 1.64                                  | 11.4                                               | 0.262                                | 0.377                                  | 0.410                                  | 2.01                                  | 3.94                                  | 7.61                                                |
| Nov., 2013 | 1.3-2.1                   | 6.07                                  | 5.54                                               | 0.230                                | 1.06                                   | 0.846                                  | 4.87                                  | 5.62                                  | 3.95                                                |
|            | 2.1-4.2                   | 16.2                                  | 3.45                                               | 0.443                                | 2.98                                   | 1.86                                   | 13.6                                  | 9.10                                  | 3.54                                                |
|            | 4.2-10.2                  | 19.2                                  | 3.08                                               | 0.472                                | 3.65                                   | 2.00                                   | 17.6                                  | 8.54                                  | 3.36                                                |
|            | >10.2                     | 17.3                                  | 0.918                                              | 0.266                                | 2.77                                   | 1.24                                   | 18.9                                  | 2.00                                  | 2.52                                                |
|            | <0.39                     | 1.08                                  | 54.4                                               | 1.88                                 | 0.393                                  | 1.04                                   | 3.55                                  | 11.3                                  | 45.6                                                |
|            | 0.39-0.69                 | 0.716                                 | 29.5                                               | 1.18                                 | 0.254                                  | 0.545                                  | 1.61                                  | 7.04                                  | 30.8                                                |
| Dec., 2013 | 0.69-1.3                  | 2.96                                  | 5.91                                               | 0.270                                | 1.13                                   | 1.96                                   | 1.93                                  | 5.07                                  | 3.70                                                |
|            | 1.3-2.1                   | 3.43                                  | 6.78                                               | 0.314                                | 1.30                                   | 2.27                                   | 2.54                                  | 6.40                                  | 4.93                                                |
|            | 2.1-4.2                   | 7.54                                  | 4.88                                               | 0.299                                | 2.32                                   | 5.14                                   | 2.90                                  | 11.9                                  | 3.80                                                |
|            | 4.2-10.2                  | 14.9                                  | 2.65                                               | 0.353                                | 3.53                                   | 6.14                                   | 12.0                                  | 10.8                                  | 3.15                                                |
|            | >10.2                     | 39.7                                  | 4.62                                               | 1.04                                 | 9.28                                   | 9.51                                   | 39.3                                  | 12.0                                  | 7.91                                                |
|            | <0.39                     | 1.06                                  | 39.7                                               | 1.37                                 | 0.414                                  | 1.54                                   | 2.97                                  | 7.24                                  | 31.3                                                |
| Haze       | 0.39-0.69                 | 0.865                                 | 24.2                                               | 1.25                                 | 0.253                                  | 0.411                                  | 1.79                                  | 4.99                                  | 21.6                                                |
|            | 0.69-1.3                  | 1.87                                  | 18.2                                               | 0.993                                | 0.631                                  | 0.831                                  | 2.39                                  | 5.04                                  | 13.1                                                |
|            | 1.3-2.1                   | 5.23                                  | 7.45                                               | 0.385                                | 1.21                                   | 1.02                                   | 4.09                                  | 6.54                                  | 5.93                                                |
|            | 2.1-4.2                   | 9.47                                  | 4.19                                               | 0.235                                | 2.00                                   | 1.61                                   | 7.19                                  | 7.47                                  | 2.70                                                |
|            | 4.2-10.2                  | 19.9                                  | 2.44                                               | 0.418                                | 4.17                                   | 3.48                                   | 18.1                                  | 6.99                                  | 3.74                                                |
|            | >10.2                     | 17.0                                  | 1.91                                               | 0.316                                | 3.29                                   | 2.22                                   | 17.3                                  | 2.62                                  | 3.15                                                |
| Asian dust | <0.39                     | 1.82                                  | 107                                                | 2.07                                 | 0.601                                  | 1.93                                   | 6.50                                  | 27.3                                  | 72.2                                                |
|            | 0.39-0.69                 | 1.34                                  | 165                                                | 3.06                                 | 0.602                                  | 1.52                                   | 6.39                                  | 36.9                                  | 131                                                 |
|            | 0.69-1.3                  | 2.41                                  | 133                                                | 1.97                                 | 0.991                                  | 2.99                                   | 5.42                                  | 30.1                                  | 105                                                 |
|            | 1.3-2.1                   | 2.43                                  | 60.9                                               | 1.00                                 | 1.20                                   | 3.77                                   | 3.27                                  | 17.3                                  | 46.0                                                |
|            | 2.1-4.2                   | 2.78                                  | 14.5                                               | 0.257                                | 1.00                                   | 3.70                                   | 1.94                                  | 11.7                                  | 8.24                                                |
|            | 4.2-10.2                  | 7.76                                  | 7.93                                               | 0.277                                | 1.77                                   | 8.49                                   | 4.64                                  | 17.8                                  | 6.14                                                |
| Asian dust | >10.2                     | 3.38                                  | 4.91                                               | <D.L.                                | 0.691                                  | 4.76                                   | 4.15                                  | 6.40                                  | 2.59                                                |
|            | <0.39                     | 2.07                                  | 141                                                | 3.71                                 | 1.20                                   | 5.17                                   | 5.78                                  | 34.8                                  | 116                                                 |
|            | 0.39-0.69                 | 1.71                                  | 69.1                                               | 2.03                                 | 0.825                                  | 2.43                                   | 2.71                                  | 21.2                                  | 54.6                                                |
|            | 0.69-1.3                  | 2.99                                  | 58.8                                               | 1.70                                 | 1.63                                   | 4.55                                   | 3.82                                  | 25.4                                  | 39.0                                                |
|            | 1.3-2.1                   | 6.39                                  | 22.0                                               | 0.862                                | 3.40                                   | 11.8                                   | 4.42                                  | 24.6                                  | 14.7                                                |
|            | 2.1-4.2                   | 14.3                                  | 18.4                                               | 0.673                                | 5.96                                   | 30.5                                   | 7.23                                  | 44.1                                  | 13.0                                                |
| Asian dust | 4.2-10.2                  | 17.8                                  | 14.8                                               | 0.663                                | 5.47                                   | 28.4                                   | 11.0                                  | 43.2                                  | 6.66                                                |
|            | >10.2                     | 2.46                                  | 2.22                                               | 0.121                                | 0.907                                  | 4.69                                   | 2.71                                  | 4.57                                  | 1.14                                                |

&lt;D.L.: Below detection limits

Table S3 Total and dissolved Fe and Al concentrations and their fractional solubilities and [d-Fe]/[d-Al] ratio in size-fractionated aerosol particles.

|            | Diameter<br>$\mu\text{m}$ | Total Al<br>$\text{ng}/\text{m}^3$ | d-Al<br>$\text{ng}/\text{m}^3$ | Al <sub>sol</sub> %<br>% | Total Fe<br>$\text{ng}/\text{m}^3$ | d-Fe<br>$\text{ng}/\text{m}^3$ | Fe <sub>sol</sub> %<br>% | [d-Fe]/[d-Al] |
|------------|---------------------------|------------------------------------|--------------------------------|--------------------------|------------------------------------|--------------------------------|--------------------------|---------------|
| Dec., 2012 | <0.39                     | 56.8                               | 2.78                           | 4.90                     | 40.4                               | 4.14                           | 10.3                     | 0.719         |
|            | 0.39-0.69                 | 22.6                               | 1.15                           | 5.08                     | 21.9                               | 2.13                           | 9.74                     | 0.901         |
|            | 0.69-1.3                  | 39.0                               | 1.69                           | 4.34                     | 38.6                               | 2.46                           | 6.39                     | 0.703         |
|            | 1.3-2.1                   | 77.7                               | 1.53                           | 1.98                     | 63.5                               | 1.49                           | 2.35                     | 0.469         |
|            | 2.1-4.2                   | 68.2                               | 0.902                          | 1.32                     | 61.0                               | 0.914                          | 1.50                     | 0.489         |
|            | 4.2-10.2                  | 122                                | 0.125                          | 0.102                    | 101.8                              | 0.108                          | 0.106                    | 0.416         |
|            | >10.2                     | 71.2                               | 0.117                          | 0.165                    | 66.8                               | 0.120                          | 0.179                    | 0.492         |
| Jan., 2013 | <0.39                     | 82.1                               | 5.71                           | 6.95                     | 90.1                               | 6.43                           | 7.14                     | 0.544         |
|            | 0.39-0.69                 | 17.6                               | 2.58                           | 14.7                     | 44.6                               | 6.34                           | 14.2                     | 1.19          |
|            | 0.69-1.3                  | 34.2                               | 3.49                           | 10.2                     | 56.5                               | 5.11                           | 9.06                     | 0.708         |
|            | 1.3-2.1                   | 88.7                               | 3.88                           | 4.37                     | 82.7                               | 3.69                           | 4.46                     | 0.460         |
|            | 2.1-4.2                   | 99.0                               | 4.14                           | 4.18                     | 99.0                               | 1.72                           | 1.74                     | 0.201         |
|            | 4.2-10.2                  | 159                                | 1.30                           | 0.821                    | 152.3                              | 0.717                          | 0.470                    | 0.266         |
|            | >10.2                     | 65.6                               | 0.762                          | 1.16                     | 56.1                               | 0.651                          | 1.16                     | 0.413         |
| Feb., 2013 | <0.39                     | 67.6                               | 0.692                          | 1.02                     | 79.5                               | 1.20                           | 1.50                     | 0.834         |
|            | 0.39-0.69                 | 15.0                               | 2.20                           | 14.7                     | 28.2                               | 3.04                           | 10.8                     | 0.667         |
|            | 0.69-1.3                  | 34.1                               | 2.81                           | 8.23                     | 51.3                               | 2.87                           | 5.60                     | 0.495         |
|            | 1.3-2.1                   | 46.7                               | 3.81                           | 8.15                     | 60.0                               | 3.07                           | 5.13                     | 0.390         |
|            | 2.1-4.2                   | 59.7                               | 2.93                           | 4.91                     | 80.5                               | 1.95                           | 2.42                     | 0.321         |
|            | 4.2-10.2                  | 61.8                               | 1.39                           | 2.25                     | 88.2                               | 0.723                          | 0.819                    | 0.251         |
|            | >10.2                     | 36.5                               | 1.02                           | 2.80                     | 44.1                               | 0.453                          | 1.03                     | 0.214         |
| Mar., 2013 | <0.39                     | 140                                | 6.96                           | 4.98                     | 163                                | 10.0                           | 6.14                     | 0.695         |
|            | 0.39-0.69                 | 66.6                               | 4.18                           | 6.28                     | 102                                | 7.83                           | 7.66                     | 0.906         |
|            | 0.69-1.3                  | 93.4                               | 7.01                           | 7.51                     | 104                                | 7.23                           | 6.95                     | 0.498         |
|            | 1.3-2.1                   | 544                                | 5.47                           | 1.01                     | 427                                | 3.20                           | 0.749                    | 0.282         |
|            | 2.1-4.2                   | 475                                | 8.20                           | 1.73                     | 398                                | 2.47                           | 0.622                    | 0.146         |
|            | 4.2-10.2                  | 222                                | 1.00                           | 0.45                     | 202                                | 0.424                          | 0.210                    | 0.204         |
|            | >10.2                     | 175                                | 0.415                          | 0.24                     | 165                                | 0.104                          | 0.0632                   | 0.121         |
| Apr., 2013 | <0.39                     | 121                                | 8.76                           | 7.23                     | 149                                | 16.6                           | 11.10                    | 0.915         |
|            | 0.39-0.69                 | 50.9                               | 4.48                           | 8.80                     | 59.4                               | 7.18                           | 12.09                    | 0.775         |
|            | 0.69-1.3                  | 103                                | 8.48                           | 8.22                     | 92.4                               | 7.63                           | 8.25                     | 0.435         |
|            | 1.3-2.1                   | 197                                | 5.25                           | 2.67                     | 60.9                               | 3.30                           | 5.42                     | 0.304         |
|            | 2.1-4.2                   | 177                                | 3.27                           | 1.85                     | 158                                | 1.70                           | 1.07                     | 0.251         |
|            | 4.2-10.2                  | 203                                | 0.77                           | 0.38                     | 183                                | 0.379                          | 0.207                    | 0.237         |
|            | >10.2                     | 116                                | 0.537                          | 0.46                     | 96.7                               | 0.257                          | 0.266                    | 0.231         |
| May, 2013  | <0.39                     | 26.0                               | 3.06                           | 11.8                     | 23.3                               | 4.48                           | 19.2                     | 0.707         |
|            | 0.39-0.69                 | 70.9                               | 3.75                           | 5.28                     | 101                                | 9.46                           | 9.39                     | 1.22          |
|            | 0.69-1.3                  | 73.2                               | 3.86                           | 5.27                     | 87.8                               | 8.82                           | 10.0                     | 1.10          |
|            | 1.3-2.1                   | 121                                | 5.08                           | 4.21                     | 125.5                              | 7.21                           | 5.74                     | 0.685         |
|            | 2.1-4.2                   | 209                                | 4.63                           | 2.22                     | 221                                | 2.25                           | 1.02                     | 0.235         |
|            | 4.2-10.2                  | 110                                | 0.415                          | 0.38                     | 113                                | 0.251                          | 0.222                    | 0.292         |
|            | >10.2                     | 819                                | 0.0548                         | 0.01                     | 863                                | 0.0901                         | 0.0104                   | 0.794         |
| Jun., 2013 | <0.39                     | 23.8                               | 0.88                           | 3.69                     | 78.8                               | 2.90                           | 3.68                     | 1.60          |
|            | 0.39-0.69                 | 37.3                               | 4.04                           | 10.8                     | 98.0                               | 6.30                           | 6.43                     | 0.753         |
|            | 0.69-1.3                  | 22.0                               | 1.86                           | 8.46                     | 53.6                               | 4.96                           | 9.25                     | 1.29          |
|            | 1.3-2.1                   | 26.6                               | 2.37                           | 8.91                     | 74.6                               | 3.87                           | 5.19                     | 0.791         |
|            | 2.1-4.2                   | 61.9                               | 2.10                           | 3.40                     | 184                                | 1.83                           | 1.00                     | 0.421         |
|            | 4.2-10.2                  | 23.9                               | 1.67                           | 6.97                     | 80.4                               | 1.59                           | 1.97                     | 0.460         |
|            | >10.2                     | 68.8                               | 2.28                           | 3.32                     | 181                                | 1.59                           | 0.878                    | 0.337         |

Table S3 Continued.

|            | Diameter<br>$\mu\text{m}$ | Total Al<br>$\text{ng}/\text{m}^3$ | d-Al<br>$\text{ng}/\text{m}^3$ | Al <sub>sol</sub> %<br>% | Total Fe<br>$\text{ng}/\text{m}^3$ | d-Fe<br>$\text{ng}/\text{m}^3$ | Fe <sub>sol</sub> %<br>% | [d-Fe]/[d-Al] |
|------------|---------------------------|------------------------------------|--------------------------------|--------------------------|------------------------------------|--------------------------------|--------------------------|---------------|
| Jul., 2013 | <0.39                     | 74.5                               | 2.68                           | 3.59                     | 103                                | 9.58                           | 9.32                     | 1.73          |
|            | 0.39-0.69                 | 32.0                               | 7.00                           | 21.9                     | 47.8                               | 17.6                           | 36.8                     | 1.21          |
|            | 0.69-1.3                  | 56.4                               | 5.55                           | 9.85                     | 92.6                               | 10.7                           | 11.6                     | 0.933         |
|            | 1.3-2.1                   | 67.5                               | 5.64                           | 8.35                     | 116                                | 6.85                           | 5.89                     | 0.587         |
|            | 2.1-4.2                   | 95.2                               | 4.08                           | 4.28                     | 160                                | 2.47                           | 1.54                     | 0.292         |
|            | 4.2-10.2                  | 122                                | 3.99                           | 3.26                     | 226                                | 1.82                           | 0.806                    | 0.221         |
|            | >10.2                     | 132                                | 0.809                          | 0.61                     | 160                                | 0.541                          | 0.338                    | 0.323         |
| Aug., 2013 | <0.39                     | 25.9                               | 1.01                           | 3.90                     | 65.7                               | 5.60                           | 8.53                     | 2.67          |
|            | 0.39-0.69                 | 14.8                               | 6.21                           | 41.9                     | 33.4                               | 8.90                           | 26.6                     | 0.693         |
|            | 0.69-1.3                  | 142                                | 7.74                           | 5.46                     | 235                                | 11.1                           | 4.71                     | 0.691         |
|            | 1.3-2.1                   | 74.3                               | 14.4                           | 19.33                    | 103                                | 13.9                           | 13.5                     | 0.466         |
|            | 2.1-4.2                   | 83.1                               | 4.56                           | 5.49                     | 132                                | 4.40                           | 3.33                     | 0.466         |
|            | 4.2-10.2                  | 149                                | 4.11                           | 2.75                     | 227                                | 2.14                           | 0.941                    | 0.251         |
|            | >10.2                     | 60.1                               | 2.60                           | 4.32                     | 117                                | 1.54                           | 1.31                     | 0.286         |
| Sep., 2013 | <0.39                     | 86.8                               | 3.37                           | 3.89                     | 162                                | 27.1                           | 16.7                     | 3.88          |
|            | 0.39-0.69                 | 15.3                               | 1.42                           | 9.31                     | 48.7                               | 13.8                           | 28.2                     | 4.67          |
|            | 0.69-1.3                  | 28.5                               | 2.67                           | 9.35                     | 69.3                               | 10.7                           | 15.4                     | 1.93          |
|            | 1.3-2.1                   | 40.1                               | 3.48                           | 8.68                     | 94.8                               | 6.68                           | 7.05                     | 0.927         |
|            | 2.1-4.2                   | 55.4                               | 4.17                           | 7.53                     | 125                                | 5.08                           | 4.08                     | 0.588         |
|            | 4.2-10.2                  | 102                                | 2.48                           | 2.44                     | 199                                | 1.52                           | 0.764                    | 0.296         |
|            | >10.2                     | 67.9                               | 0.262                          | 0.39                     | 143                                | 0.210                          | 0.147                    | 0.387         |
| Oct., 2013 | <0.39                     | 43.5                               | 1.69                           | 3.89                     | 53.6                               | 4.34                           | 8.10                     | 1.24          |
|            | 0.39-0.69                 | 7.01                               | 0.605                          | 8.63                     | 16.3                               | 1.62                           | 9.94                     | 1.30          |
|            | 0.69-1.3                  | 17.9                               | 1.97                           | 11.0                     | 23.8                               | 2.33                           | 9.79                     | 0.571         |
|            | 1.3-2.1                   | 23.5                               | 1.29                           | 5.50                     | 29.7                               | 1.59                           | 5.35                     | 0.594         |
|            | 2.1-4.2                   | 29.6                               | 1.14                           | 3.83                     | 39.5                               | 1.22                           | 3.09                     | 0.520         |
|            | 4.2-10.2                  | 40.8                               | 1.91                           | 4.68                     | 59.7                               | 1.41                           | 2.37                     | 0.357         |
|            | >10.2                     | 19.7                               | 0.498                          | 2.53                     | 33.5                               | 0.505                          | 1.51                     | 0.490         |
| Nov., 2013 | <0.39                     | 31.4                               | 1.98                           | 6.30                     | 47.9                               | 7.51                           | 15.7                     | 1.83          |
|            | 0.39-0.69                 | 14.1                               | 1.38                           | 9.75                     | 26.3                               | 4.30                           | 16.3                     | 1.51          |
|            | 0.69-1.3                  | 24.9                               | 3.01                           | 12.1                     | 28.9                               | 4.65                           | 16.1                     | 0.748         |
|            | 1.3-2.1                   | 102                                | 2.61                           | 2.57                     | 95.8                               | 2.81                           | 2.94                     | 0.520         |
|            | 2.1-4.2                   | 64.0                               | 2.40                           | 3.75                     | 56.7                               | 2.17                           | 3.83                     | 0.437         |
|            | 4.2-10.2                  | 105                                | 1.37                           | 1.31                     | 93.1                               | 1.11                           | 1.19                     | 0.392         |
|            | >10.2                     | 36.7                               | 0.394                          | 1.07                     | 37.5                               | 0.34                           | 0.916                    | 0.422         |
| Dec., 2013 | <0.39                     | 34.6                               | 2.73                           | 7.90                     | 62.5                               | 6.14                           | 9.82                     | 1.09          |
|            | 0.39-0.69                 | 11.0                               | 0.72                           | 6.56                     | 31.8                               | 3.03                           | 9.53                     | 2.04          |
|            | 0.69-1.3                  | 11.5                               | 1.46                           | 12.6                     | 14.8                               | 4.02                           | 27.2                     | 1.33          |
|            | 1.3-2.1                   | 24.5                               | 1.71                           | 6.97                     | 35.4                               | 2.76                           | 7.80                     | 0.782         |
|            | 2.1-4.2                   | 31.9                               | 1.17                           | 3.66                     | 45.2                               | 1.27                           | 2.80                     | 0.523         |
|            | 4.2-10.2                  | 42.2                               | 0.879                          | 2.08                     | 52.3                               | 0.742                          | 1.42                     | 0.408         |
|            | >10.2                     | 14.7                               | 0.303                          | 2.07                     | 16.0                               | 0.294                          | 1.84                     | 0.469         |
| Haze       | <0.39                     | 84.3                               | 3.76                           | 4.46                     | 155                                | 6.86                           | 4.42                     | 0.881         |
|            | 0.39-0.69                 | 45.5                               | 8.37                           | 18.4                     | 199                                | 25.4                           | 12.8                     | 1.47          |
|            | 0.69-1.3                  | 93.4                               | 10.3                           | 11.0                     | 215                                | 19.3                           | 8.96                     | 0.906         |
|            | 1.3-2.1                   | 160                                | 10.7                           | 6.68                     | 299                                | 13.1                           | 4.37                     | 0.589         |
|            | 2.1-4.2                   | 208                                | 6.47                           | 3.11                     | 393                                | 6.61                           | 1.68                     | 0.494         |
|            | 4.2-10.2                  | 278                                | 8.59                           | 3.09                     | 536                                | 7.62                           | 1.42                     | 0.429         |
|            | >10.2                     | 304                                | 3.31                           | 1.09                     | 476                                | 3.53                           | 0.741                    | 0.515         |
| Dust       | <0.39                     | 336                                | 11.8                           | 3.50                     | 334                                | 19.0                           | 5.67                     | 0.778         |
|            | 0.39-0.69                 | 141                                | 10.9                           | 7.75                     | 157                                | 18.3                           | 11.6                     | 0.809         |
|            | 0.69-1.3                  | 292                                | 15.9                           | 5.44                     | 242                                | 14.6                           | 6.03                     | 0.443         |
|            | 1.3-2.1                   | 537                                | 11.5                           | 2.15                     | 452                                | 6.20                           | 1.37                     | 0.260         |
|            | 2.1-4.2                   | 668                                | 2.34                           | 0.35                     | 513                                | 1.90                           | 0.370                    | 0.393         |
| 4.2-10.2   | 652                       | 2.41                               | 0.37                           | 517                      | 1.07                               | 0.208                          | 0.215                    |               |
| >10.2      | 194                       | 0.478                              | 0.25                           | 160                      | 0.41                               | 0.258                          | 0.417                    |               |

&lt;D.L.: Below detection limits

Table S4 Total metal concentration of target metals in size-fractionated aerosol samples.

| Sampling date | Diameter<br>µm | Ti<br>ng/m <sup>3</sup> | V<br>ng/m <sup>3</sup> | Mn<br>ng/m <sup>3</sup> | Co<br>ng/m <sup>3</sup> | Ni<br>ng/m <sup>3</sup> | Cu<br>ng/m <sup>3</sup> | Zn<br>ng/m <sup>3</sup> | Cd<br>ng/m <sup>3</sup> | Sb<br>ng/m <sup>3</sup> | Pb<br>ng/m <sup>3</sup> |
|---------------|----------------|-------------------------|------------------------|-------------------------|-------------------------|-------------------------|-------------------------|-------------------------|-------------------------|-------------------------|-------------------------|
| Dec., 2012    | <0.39          | 4.08                    | 0.773                  | 1.80                    | 0.0359                  | 0.534                   | 0.911                   | 10.8                    | 0.155                   | 0.448                   | 4.68                    |
|               | 0.39-0.69      | 1.81                    | 0.472                  | 1.87                    | 0.0195                  | 0.258                   | 0.882                   | 7.91                    | 0.115                   | 0.331                   | 4.19                    |
|               | 0.69-1.3       | 3.86                    | 0.285                  | 2.17                    | 0.0261                  | 0.203                   | 0.831                   | 7.80                    | 0.0810                  | 0.225                   | 3.19                    |
|               | 1.3-2.1        | 6.12                    | 0.193                  | 1.93                    | 0.0352                  | 0.142                   | 1.06                    | 6.00                    | 0.0582                  | 0.194                   | 1.78                    |
|               | 2.1-4.2        | 5.28                    | 0.127                  | 1.34                    | 0.0271                  | 0.087                   | 0.893                   | 2.39                    | 0.0224                  | 0.126                   | 0.681                   |
|               | 4.2-10.2       | 8.72                    | 0.168                  | 2.32                    | 0.0663                  | 0.110                   | 1.20                    | 4.84                    | 0.0174                  | 0.123                   | 0.819                   |
|               | >10.2          | 4.53                    | 0.0852                 | 1.26                    | 0.0350                  | 0.0504                  | 0.380                   | 3.68                    | 0.00545                 | 0.0477                  | 0.583                   |
| Jan., 2013    | <0.39          | 7.71                    | 0.957                  | 3.90                    | 0.0648                  | 0.798                   | 1.37                    | 15.1                    | 0.155                   | 0.448                   | 6.31                    |
|               | 0.39-0.69      | 2.85                    | 0.444                  | 3.91                    | 0.0253                  | 0.371                   | 1.08                    | 12.5                    | 0.135                   | 0.326                   | 6.24                    |
|               | 0.69-1.3       | 4.47                    | 0.316                  | 4.30                    | 0.0282                  | 0.230                   | 1.12                    | 15.5                    | 0.156                   | 0.321                   | 6.50                    |
|               | 1.3-2.1        | 9.72                    | 0.227                  | 3.62                    | 0.0398                  | 0.157                   | 1.40                    | 11.8                    | 0.119                   | 0.230                   | 3.90                    |
|               | 2.1-4.2        | 10.0                    | 0.176                  | 2.42                    | 0.0351                  | 0.189                   | 1.44                    | 6.06                    | 0.0337                  | 0.179                   | 1.48                    |
|               | 4.2-10.2       | 14.0                    | 0.235                  | 3.26                    | 0.0619                  | 0.303                   | 1.65                    | 6.84                    | 0.0300                  | 0.256                   | 1.13                    |
|               | >10.2          | 5.23                    | 0.0324                 | 1.32                    | 0.0323                  | 0.106                   | 0.447                   | 3.42                    | 0.0255                  | 0.0340                  | 0.417                   |
| Feb., 2013    | <0.39          | 5.06                    | 0.913                  | 3.22                    | 0.0323                  | 0.741                   | 1.31                    | 12.4                    | 0.189                   | 0.485                   | 6.00                    |
|               | 0.39-0.69      | 1.39                    | 0.296                  | 2.19                    | 0.0077                  | 0.221                   | 0.640                   | 6.57                    | 0.107                   | 0.246                   | 3.54                    |
|               | 0.69-1.3       | 3.07                    | 0.248                  | 3.61                    | 0.0155                  | 0.156                   | 0.834                   | 8.66                    | 0.121                   | 0.266                   | 4.05                    |
|               | 1.3-2.1        | 4.19                    | 0.130                  | 2.56                    | 0.0101                  | 0.0852                  | 0.815                   | 5.54                    | 0.0541                  | 0.181                   | 1.75                    |
|               | 2.1-4.2        | 4.44                    | 0.0855                 | 1.99                    | 0.0106                  | 0.0468                  | 0.877                   | 3.16                    | 0.0287                  | 0.158                   | 0.783                   |
|               | 4.2-10.2       | 4.37                    | 0.0774                 | 2.16                    | 0.0214                  | 0.0741                  | 0.97                    | 4.07                    | 0.0253                  | 0.110                   | 0.674                   |
|               | >10.2          | 2.48                    | 0.0108                 | 1.08                    | 0.0098                  | <D.L.                   | 0.404                   | 3.14                    | 0.0127                  | 0.0274                  | 0.334                   |
| Mar., 2013    | <0.39          | 9.75                    | 2.01                   | 6.03                    | 0.0872                  | 0.959                   | 2.28                    | 19.3                    | 0.343                   | 0.793                   | 9.06                    |
|               | 0.39-0.69      | 5.40                    | 0.968                  | 6.21                    | 0.0489                  | 0.523                   | 1.61                    | 18.4                    | 0.177                   | 0.729                   | 7.86                    |
|               | 0.69-1.3       | 7.20                    | 0.391                  | 4.28                    | 0.0314                  | 0.251                   | 0.956                   | 11.6                    | 0.117                   | 0.313                   | 3.67                    |
|               | 1.3-2.1        | 13.4                    | 0.402                  | 4.06                    | 0.0503                  | 0.289                   | 1.02                    | 8.29                    | 0.0733                  | 0.248                   | 2.17                    |
|               | 2.1-4.2        | 29.1                    | 0.859                  | 8.70                    | 0.129                   | 0.529                   | 2.15                    | 13.1                    | 0.0788                  | 0.394                   | 2.78                    |
|               | 4.2-10.2       | 32.8                    | 0.795                  | 10.4                    | 0.138                   | 0.529                   | 2.07                    | 8.16                    | 0.0771                  | 0.221                   | 1.67                    |
|               | >10.2          | 11.4                    | 0.263                  | 3.69                    | 0.0486                  | 0.182                   | 0.60                    | 3.71                    | 0.0092                  | 0.0502                  | 0.467                   |
| Apr., 2013    | <0.39          | 8.31                    | 3.07                   | 6.84                    | 0.0671                  | 1.54                    | 2.52                    | 24.8                    | 0.350                   | 0.730                   | 11.2                    |
|               | 0.39-0.69      | 3.43                    | 0.687                  | 3.66                    | 0.0167                  | 0.327                   | 1.13                    | 14.1                    | 0.165                   | 0.312                   | 5.32                    |
|               | 0.69-1.3       | 6.64                    | 0.543                  | 4.05                    | 0.0397                  | 0.352                   | 1.24                    | 17.2                    | 0.145                   | 0.267                   | 4.75                    |
|               | 1.3-2.1        | 11.1                    | 0.428                  | 3.50                    | 0.0562                  | 0.353                   | 1.04                    | 13.3                    | 0.0892                  | 0.183                   | 1.85                    |
|               | 2.1-4.2        | 11.9                    | 0.360                  | 3.46                    | 0.0322                  | 0.171                   | 0.861                   | 7.38                    | 0.0487                  | 0.098                   | 1.38                    |
|               | 4.2-10.2       | 11.7                    | 0.318                  | 4.66                    | 0.0689                  | 0.236                   | 0.785                   | 5.93                    | 0.0375                  | 0.0649                  | 1.01                    |
|               | >10.2          | 6.72                    | 0.167                  | 2.29                    | 0.0237                  | 0.0770                  | 0.291                   | 2.27                    | 0.0104                  | 0.0332                  | 0.329                   |
| May, 2013     | <0.39          | 3.28                    | 1.02                   | 2.49                    | 0.0219                  | 0.50                    | 0.776                   | 7.72                    | 0.098                   | 0.213                   | 2.56                    |
|               | 0.39-0.69      | 2.57                    | 0.776                  | 2.71                    | 0.0252                  | 0.382                   | 0.760                   | 10.0                    | 0.118                   | 0.292                   | 3.24                    |
|               | 0.69-1.3       | 4.76                    | 0.606                  | 3.63                    | 0.0310                  | 0.396                   | 1.09                    | 14.5                    | 0.112                   | 0.277                   | 3.76                    |
|               | 1.3-2.1        | 8.52                    | 0.404                  | 2.90                    | 0.0374                  | 0.301                   | 0.970                   | 10.1                    | 0.0576                  | 0.192                   | 1.82                    |
|               | 2.1-4.2        | 13.7                    | 0.432                  | 4.18                    | 0.0485                  | 0.354                   | 1.46                    | 7.41                    | 0.0555                  | 0.200                   | 1.49                    |
|               | 4.2-10.2       | 12.4                    | 0.352                  | 4.47                    | 0.0592                  | 0.283                   | 1.09                    | 4.66                    | 0.0207                  | 0.139                   | 1.12                    |
|               | >10.2          | 17.7                    | 0.492                  | 7.75                    | 0.0727                  | 0.405                   | 1.28                    | 6.92                    | 0.0275                  | 0.0778                  | 1.42                    |
| Jun., 2013    | <0.39          | 1.37                    | 2.03                   | 3.31                    | 0.0307                  | 0.658                   | 1.27                    | 11.0                    | 0.152                   | 0.517                   | 3.12                    |
|               | 0.39-0.69      | 0.442                   | 0.745                  | 1.92                    | 0.0208                  | 0.183                   | 0.562                   | 6.23                    | 0.0632                  | 0.185                   | 1.51                    |
|               | 0.69-1.3       | 1.23                    | 0.426                  | 1.96                    | 0.0188                  | 0.304                   | 0.593                   | 6.43                    | 0.0480                  | 0.137                   | 1.14                    |
|               | 1.3-2.1        | 2.43                    | 0.297                  | 1.82                    | 0.0107                  | <D.L.                   | 0.694                   | 6.13                    | 0.0484                  | 0.100                   | 0.921                   |
|               | 2.1-4.2        | 2.61                    | 0.164                  | 2.06                    | 0.0184                  | 0.0277                  | 0.804                   | 3.20                    | 0.0301                  | 0.0812                  | 0.723                   |
|               | 4.2-10.2       | 2.14                    | 0.140                  | 3.23                    | 0.0253                  | <D.L.                   | 0.728                   | 3.80                    | 0.0338                  | 0.0619                  | 0.645                   |
|               | >10.2          | 1.69                    | 0.103                  | 2.58                    | 0.0097                  | <D.L.                   | 0.412                   | 2.07                    | 0.00896                 | 0.0435                  | 0.381                   |

Table S4 Continued.

|              | Diameter<br>µm | Ti<br>ng/m <sup>3</sup> | V<br>ng/m <sup>3</sup> | Mn<br>ng/m <sup>3</sup> | Co<br>ng/m <sup>3</sup> | Ni<br>ng/m <sup>3</sup> | Cu<br>ng/m <sup>3</sup> | Zn<br>ng/m <sup>3</sup> | Cd<br>ng/m <sup>3</sup> | Sb<br>ng/m <sup>3</sup> | Pb<br>ng/m <sup>3</sup> |
|--------------|----------------|-------------------------|------------------------|-------------------------|-------------------------|-------------------------|-------------------------|-------------------------|-------------------------|-------------------------|-------------------------|
| Jul., 2013   | <0.39          | 4.72                    | 2.35                   | 3.59                    | 0.0447                  | 1.04                    | 0.865                   | 10                      | 0.12                    | 0.339                   | 3.50                    |
|              | 0.39-0.69      | 1.83                    | 1.53                   | 2.43                    | 0.0220                  | 0.685                   | 0.780                   | 9.17                    | 0.08                    | 0.278                   | 2.15                    |
|              | 0.69-1.3       | 3.03                    | 0.785                  | 2.54                    | 0.0389                  | 1.03                    | 0.903                   | 9.52                    | 0.06                    | 0.186                   | 1.52                    |
|              | 1.3-2.1        | 5.91                    | 0.433                  | 2.34                    | 0.0637                  | 0.455                   | 0.946                   | 6.48                    | 0.05                    | 0.154                   | 1.07                    |
|              | 2.1-4.2        | 6.67                    | 0.289                  | 2.64                    | 0.0634                  | 0.301                   | 0.935                   | 4.22                    | 0.03                    | 0.121                   | 0.822                   |
|              | 4.2-10.2       | 8.47                    | 0.287                  | 3.99                    | 0.0406                  | 0.291                   | 0.880                   | 4.22                    | 0.03                    | 0.0867                  | 0.815                   |
|              | >10.2          | 5.29                    | 0.175                  | 3.16                    | 0.0311                  | 0.165                   | 0.487                   | 3.16                    | 0.01                    | 0.0257                  | 0.410                   |
| Aug-2., 2013 | <0.39          | 1.34                    | 3.48                   | 3.72                    | 0.0908                  | 1.02                    | 2.44                    | 19.0                    | 0.26                    | 0.661                   | 6.24                    |
|              | 0.39-0.69      | 0.672                   | 1.58                   | 2.83                    | 0.0364                  | 0.612                   | 2.04                    | 15.5                    | 0.17                    | 0.481                   | 4.61                    |
|              | 0.69-1.3       | 2.00                    | 0.873                  | 2.62                    | 0.0274                  | 1.53                    | 1.94                    | 17.1                    | 0.15                    | 0.369                   | 3.75                    |
|              | 1.3-2.1        | 4.13                    | 0.450                  | 2.06                    | 0.0376                  | 0.250                   | 1.31                    | 12.7                    | 0.10                    | 0.233                   | 2.17                    |
|              | 2.1-4.2        | 5.26                    | 0.265                  | 2.22                    | 0.0335                  | 0.162                   | 1.16                    | 5.11                    | 0.04                    | 0.149                   | 1.16                    |
|              | 4.2-10.2       | 7.36                    | 0.271                  | 3.83                    | 0.0612                  | 0.0459                  | 1.21                    | 4.46                    | 0.03                    | 0.110                   | 0.96                    |
|              | >10.2          | 2.76                    | 0.110                  | 2.83                    | 0.0170                  | <D.L.                   | 0.460                   | 2.54                    | 0.01                    | 0.0315                  | 0.299                   |
| Sep., 2013   | <0.39          | 4.86                    | 1.87                   | 6.51                    | 0.0499                  | 0.709                   | 2.37                    | 19.5                    | 0.33                    | 0.839                   | 8.05                    |
|              | 0.39-0.69      | 0.899                   | 0.461                  | 3.90                    | 0.0056                  | 0.138                   | 0.769                   | 10.4                    | 0.15                    | 0.277                   | 2.93                    |
|              | 0.69-1.3       | 2.56                    | 0.323                  | 4.47                    | 0.0139                  | 0.105                   | 0.893                   | 13.7                    | 0.19                    | 0.451                   | 3.30                    |
|              | 1.3-2.1        | 4.35                    | 0.221                  | 3.10                    | 0.0219                  | 0.290                   | 1.23                    | 14.1                    | 0.20                    | 0.455                   | 3.45                    |
|              | 2.1-4.2        | 4.77                    | 0.171                  | 2.95                    | 0.0266                  | 0.115                   | 1.35                    | 4.89                    | 0.20                    | 0.402                   | 3.77                    |
|              | 4.2-10.2       | 6.58                    | 0.182                  | 5.02                    | 0.0402                  | 0.02                    | 1.76                    | 6.79                    | 0.25                    | 0.312                   | 5.75                    |
|              | >10.2          | 3.42                    | 0.130                  | 4.45                    | 0.0367                  | <D.L.                   | 1.02                    | 4.43                    | 0.10                    | 0.0908                  | 3.07                    |
| Oct., 2013   | <0.39          | 4.06                    | 0.601                  | 1.98                    | 0.0179                  | 0.548                   | 0.898                   | 8.94                    | 0.12                    | 0.267                   | 3.61                    |
|              | 0.39-0.69      | 1.02                    | 0.204                  | 1.16                    | 0.0189                  | 0.534                   | 0.373                   | 4.74                    | 0.06                    | 0.158                   | 1.90                    |
|              | 0.69-1.3       | 1.89                    | 0.108                  | 1.24                    | 0.0123                  | 0.681                   | 0.399                   | 4.66                    | 0.04                    | 0.112                   | 1.36                    |
|              | 1.3-2.1        | 2.14                    | 0.0735                 | 0.914                   | 8.28.E-03               | 0.252                   | 0.479                   | 3.40                    | 0.02                    | 0.107                   | 0.713                   |
|              | 2.1-4.2        | 2.89                    | 0.0714                 | 0.86                    | 0.0107                  | 0.176                   | 0.615                   | 2.05                    | 0.01                    | 0.0917                  | 0.453                   |
|              | 4.2-10.2       | 3.47                    | 0.0834                 | 1.85                    | 0.0178                  | 0.287                   | 0.956                   | 2.78                    | 0.02                    | 0.0921                  | 0.572                   |
|              | >10.2          | 1.68                    | 0.0561                 | 0.915                   | 8.00.E-04               | 0.170                   | 0.333                   | 1.49                    | 0.01                    | 0.0298                  | 0.264                   |
| Nov., 2013   | <0.39          | 4.72                    | 1.23                   | 3.00                    | 0.0378                  | 0.875                   | 1.19                    | 12.9                    | 0.14                    | 0.567                   | 4.82                    |
|              | 0.39-0.69      | 2.12                    | 0.334                  | 2.25                    | 0.0081                  | 0.477                   | 0.650                   | 7.79                    | 0.10                    | 0.272                   | 3.03                    |
|              | 0.69-1.3       | 2.93                    | 0.166                  | 1.65                    | 0.0167                  | 0.290                   | 0.566                   | 6.46                    | 0.04                    | 0.150                   | 2.13                    |
|              | 1.3-2.1        | 8.30                    | 0.236                  | 2.13                    | 0.0281                  | 0.638                   | 1.23                    | 7.98                    | 0.08                    | 0.243                   | 2.04                    |
|              | 2.1-4.2        | 5.50                    | 0.136                  | 1.22                    | 0.0234                  | 0.431                   | 0.890                   | 2.79                    | 0.03                    | 0.137                   | 0.726                   |
|              | 4.2-10.2       | 8.12                    | 0.170                  | 1.87                    | 0.0316                  | 0.495                   | 1.36                    | 4.71                    | 0.03                    | 0.154                   | 1.18                    |
|              | >10.2          | 3.38                    | 0.0599                 | 0.875                   | 0.0159                  | 0.394                   | 0.588                   | 3.12                    | 0.01                    | 0.0488                  | 0.68                    |
| Dec., 2013   | <0.39          | 5.85                    | 0.254                  | 3.20                    | 0.0362                  | 1.49                    | 1.49                    | 17.9                    | 0.16                    | 0.467                   | 6.33                    |
|              | 0.39-0.69      | 2.17                    | 0.254                  | 2.31                    | 0.0272                  | 0.885                   | 0.945                   | 11.5                    | 0.16                    | 0.399                   | 5.62                    |
|              | 0.69-1.3       | 1.99                    | 0.155                  | 0.59                    | 0.0172                  | 0.261                   | 0.365                   | 3.52                    | 0.04                    | 0.146                   | 1.42                    |
|              | 1.3-2.1        | 3.49                    | 0.0925                 | 1.09                    | 0.0199                  | 0.067                   | 0.786                   | 5.51                    | 0.04                    | 0.160                   | 1.39                    |
|              | 2.1-4.2        | 4.13                    | 0.0693                 | 0.69                    | 0.0217                  | 0.352                   | 0.923                   | 2.74                    | 0.01                    | 0.114                   | 0.661                   |
|              | 4.2-10.2       | 4.68                    | 0.0712                 | 0.89                    | 0.0198                  | 0.525                   | 0.791                   | 2.58                    | 0.02                    | 0.295                   | 0.610                   |
|              | >10.2          | 1.81                    | 0.0185                 | 0.22                    | 2.66.E-03               | 0.269                   | 0.165                   | 1.38                    | 0.00                    | 0.0310                  | 0.220                   |
| Haze         | <0.39          | 6.01                    | 2.09                   | 8.04                    | 0.171                   | 1.43                    | 0.601                   | 26.9                    | 0.41                    | 0.954                   | 13.0                    |
|              | 0.39-0.69      | 4.90                    | 1.90                   | 16.4                    | 0.170                   | 1.47                    | 3.36                    | 43.9                    | 0.63                    | 1.09                    | 20.6                    |
|              | 0.69-1.3       | 9.75                    | 1.17                   | 16.5                    | 0.224                   | 1.01                    | 3.25                    | 45.3                    | 0.54                    | 0.907                   | 19.4                    |
|              | 1.3-2.1        | 15.4                    | 0.765                  | 9.31                    | 0.170                   | 0.372                   | 4.11                    | 30.9                    | 0.27                    | 1.17                    | 10.2                    |
|              | 2.1-4.2        | 17.2                    | 0.610                  | 7.48                    | 0.234                   | 0.835                   | 5.13                    | 17.4                    | 0.12                    | 1.07                    | 4.88                    |
|              | 4.2-10.2       | 19.2                    | 0.568                  | 7.62                    | 0.220                   | 0.399                   | 6.33                    | 20.5                    | 0.09                    | 0.748                   | 3.40                    |
|              | >10.2          | 19.1                    | 0.459                  | 9.79                    | 0.496                   | 0.932                   | 3.84                    | 29.9                    | 0.12                    | 0.363                   | 3.24                    |
| Asian dust   | <0.39          | 21.5                    | 3.86                   | 10.8                    | 0.158                   | 2.59                    | 3.37                    | 33.8                    | 0.47                    | 0.878                   | 18.8                    |
|              | 0.39-0.69      | 9.33                    | 1.54                   | 9.46                    | 0.0868                  | 1.51                    | 3.08                    | 33.1                    | 0.38                    | 0.663                   | 17.7                    |
|              | 0.69-1.3       | 16.8                    | 1.07                   | 10.4                    | 0.107                   | 1.12                    | 2.51                    | 32.8                    | 0.28                    | 0.478                   | 12.7                    |
|              | 1.3-2.1        | 31.4                    | 1.12                   | 10.5                    | 0.177                   | 0.829                   | 2.07                    | 23.9                    | 0.20                    | 0.314                   | 6.04                    |
|              | 2.1-4.2        | 35.9                    | 1.13                   | 11.2                    | 0.197                   | 0.728                   | 1.94                    | 13.0                    | 0.09                    | 0.179                   | 3.22                    |
|              | 4.2-10.2       | 35.5                    | 1.00                   | 12.0                    | 0.174                   | 0.936                   | 1.52                    | 9.97                    | 0.08                    | 0.124                   | 2.00                    |
|              | >10.2          | 10.1                    | 0.300                  | 4.15                    | 0.0717                  | 0.232                   | 0.480                   | 4.27                    | 0.03                    | 0.0432                  | 0.586                   |

&lt;D.L.: Below detection limits



Table S5 Dissolved metal concentration in size-fractionated aerosol particles.

|            | µm        | Ti<br>ng/m <sup>3</sup> | V<br>ng/m <sup>3</sup> | Mn<br>ng/m <sup>3</sup> | Co<br>ng/m <sup>3</sup> | Ni<br>ng/m <sup>3</sup> | Cu<br>ng/m <sup>3</sup> | Zn<br>ng/m <sup>3</sup> | Cd<br>ng/m <sup>3</sup> | Sb<br>ng/m <sup>3</sup> | Pb<br>ng/m <sup>3</sup> |
|------------|-----------|-------------------------|------------------------|-------------------------|-------------------------|-------------------------|-------------------------|-------------------------|-------------------------|-------------------------|-------------------------|
| Dec., 2012 | <0.39     | <D.L.                   | 0.541                  | 0.827                   | 0.0216                  | 0.209                   | 0.539                   | 7.57                    | 0.117                   | 0.305                   | 2.34                    |
|            | 0.39-0.69 | <D.L.                   | 0.163                  | 0.810                   | <D.L.                   | <D.L.                   | 0.251                   | 3.41                    | 0.0716                  | 0.0982                  | 1.09                    |
|            | 0.69-1.3  | <D.L.                   | 0.134                  | 1.00                    | 1.60.E-03               | 0.0101                  | 0.331                   | 4.31                    | 0.0545                  | 0.0963                  | 0.975                   |
|            | 1.3-2.1   | <D.L.                   | 0.0449                 | 0.737                   | 2.64.E-04               | <D.L.                   | 0.491                   | 2.77                    | 0.0327                  | 0.0766                  | 0.306                   |
|            | 2.1-4.2   | <D.L.                   | 0.0252                 | 0.590                   | 4.59.E-03               | 0.0174                  | 0.438                   | 1.54                    | 0.0123                  | 0.0576                  | 0.0825                  |
|            | 4.2-10.2  | <D.L.                   | 0.0152                 | 0.519                   | 3.73.E-03               | 0.0123                  | 0.191                   | 1.18                    | 5.38.E-03               | 0.0221                  | 9.12.E-03               |
|            | >10.2     | <D.L.                   | 0.0139                 | 0.375                   | 2.38.E-03               | 0.0109                  | 0.0925                  | 1.25                    | 3.89.E-03               | 0.0105                  | 0.0103                  |
| Jan., 2013 | <0.39     | <D.L.                   | 0.735                  | 1.94                    | 0.0275                  | 0.424                   | 0.618                   | 13.1                    | 0.117                   | 0.176                   | 3.53                    |
|            | 0.39-0.69 | 0.0264                  | 0.455                  | 2.58                    | 0.0128                  | 0.207                   | 0.584                   | 13.9                    | 0.179                   | 0.130                   | 3.74                    |
|            | 0.69-1.3  | 0.0171                  | 0.198                  | 2.63                    | 0.0082                  | 0.0903                  | 0.516                   | 12.4                    | 0.132                   | 0.0874                  | 3.08                    |
|            | 1.3-2.1   | 0.0272                  | 0.0988                 | 2.12                    | 0.0087                  | 0.0613                  | 0.680                   | 9.94                    | 0.103                   | 0.0679                  | 1.45                    |
|            | 2.1-4.2   | <D.L.                   | 0.0324                 | 1.46                    | 0.0112                  | 0.0361                  | 0.737                   | 5.26                    | 0.0428                  | 0.0391                  | 0.342                   |
|            | 4.2-10.2  | <D.L.                   | 0.0089                 | 1.07                    | 0.0066                  | 0.0296                  | 0.395                   | 3.69                    | 0.0123                  | 0.0168                  | 0.108                   |
|            | >10.2     | <D.L.                   | <D.L.                  | 0.483                   | 1.53.E-03               | 0.0120                  | 0.106                   | 2.15                    | 4.54.E-03               | 5.94.E-03               | 0.0518                  |
| Feb., 2013 | <0.39     | 1.53.E-04               | 0.125                  | 0.269                   | 4.12.E-03               | 0.0505                  | 0.0840                  | 1.54                    | 0.151                   | <D.L.                   | 0.540                   |
|            | 0.39-0.69 | <D.L.                   | 0.174                  | 0.942                   | 5.57.E-03               | 0.0608                  | 0.172                   | 3.38                    | 0.095                   | <D.L.                   | 1.26                    |
|            | 0.69-1.3  | <D.L.                   | 0.113                  | 1.22                    | 4.37.E-03               | 0.0336                  | 0.211                   | 3.62                    | 0.134                   | <D.L.                   | 1.09                    |
|            | 1.3-2.1   | <D.L.                   | 0.0824                 | 1.44                    | 5.42.E-03               | 0.0054                  | 0.356                   | 3.65                    | 0.162                   | <D.L.                   | 0.654                   |
|            | 2.1-4.2   | <D.L.                   | 0.0373                 | 1.12                    | 6.32.E-03               | 9.23.E-03               | 0.518                   | 2.70                    | 0.227                   | <D.L.                   | 0.222                   |
|            | 4.2-10.2  | <D.L.                   | 0.0226                 | 1.07                    | 5.93.E-03               | 0.0159                  | 0.390                   | 3.22                    | 0.245                   | <D.L.                   | 0.0678                  |
|            | >10.2     | <D.L.                   | 0.0199                 | 0.654                   | 4.37.E-03               | <D.L.                   | 0.150                   | 2.64                    | 0.655                   | <D.L.                   | 0.0426                  |
| Mar., 2013 | <0.39     | 0.0277                  | 1.47                   | 3.30                    | 0.0424                  | 0.550                   | 0.910                   | 17.3                    | 0.217                   | 0.304                   | 4.65                    |
|            | 0.39-0.69 | 0.0366                  | 0.624                  | 2.96                    | 0.0157                  | 0.202                   | 0.492                   | 14.1                    | 0.154                   | 0.157                   | 2.83                    |
|            | 0.69-1.3  | 0.0387                  | 0.317                  | 3.31                    | 0.0145                  | 0.110                   | 0.517                   | 14.9                    | 0.124                   | 0.116                   | 2.82                    |
|            | 1.3-2.1   | <D.L.                   | 0.0918                 | 2.55                    | 0.0132                  | 0.0512                  | 0.540                   | 7.46                    | 0.0661                  | 0.0486                  | 0.572                   |
|            | 2.1-4.2   | 0.01                    | 0.0866                 | 4.34                    | 0.0268                  | 0.0756                  | 0.729                   | 9.81                    | 0.0815                  | 0.0404                  | 0.482                   |
|            | 4.2-10.2  | <D.L.                   | 0.0336                 | 4.88                    | 0.0209                  | 0.0644                  | 0.471                   | 4.05                    | 0.0311                  | 0.0207                  | 0.0311                  |
|            | >10.2     | <D.L.                   | 0.0072                 | 1.17                    | 3.82.E-03               | 0.0171                  | 0.0740                  | 1.15                    | 8.55.E-03               | 4.47.E-03               | 0.0207                  |
| Apr., 2013 | <0.39     | 0.154                   | 2.19                   | 3.53                    | 0.0247                  | 0.857                   | 1.21                    | 20.2                    | 0.256                   | 0.363                   | 7.52                    |
|            | 0.39-0.69 | 0.0809                  | 0.461                  | 1.98                    | 6.23.E-03               | 0.111                   | 0.646                   | 11.5                    | 0.121                   | 0.151                   | 3.35                    |
|            | 0.69-1.3  | 0.128                   | 0.290                  | 2.41                    | 2.45.E-03               | 0.0727                  | 0.685                   | 14.5                    | 0.113                   | 0.122                   | 2.36                    |
|            | 1.3-2.1   | 0.0773                  | 0.116                  | 1.62                    | 0.0110                  | 0.0792                  | 0.503                   | 9.89                    | 0.0590                  | 0.0678                  | 0.509                   |
|            | 2.1-4.2   | 0.0504                  | 0.0516                 | 1.94                    | 0.0204                  | 9.74.E-03               | 0.341                   | 4.97                    | 0.0444                  | 0.0271                  | 0.174                   |
|            | 4.2-10.2  | 0.0559                  | 0.0429                 | 2.21                    | 0.0126                  | 0.0128                  | 0.200                   | 2.68                    | 0.0156                  | 0.0126                  | 0.0257                  |
|            | >10.2     | 0.169                   | 0.0167                 | 0.745                   | <D.L.                   | <D.L.                   | 0.0622                  | 0.796                   | 9.1.E-03                | 7.97.E-03               | 9.20.E-03               |
| May, 2013  | <0.39     | 0.0105                  | 0.594                  | 1.12                    | 0.0126                  | 0.217                   | 0.262                   | 5.75                    | 0.0606                  | <D.L.                   | 0.917                   |
|            | 0.39-0.69 | <D.L.                   | 0.737                  | 1.98                    | 0.0144                  | 0.233                   | 0.422                   | 11.0                    | 0.112                   | <D.L.                   | 2.55                    |
|            | 0.69-1.3  | <D.L.                   | 0.359                  | 1.68                    | 9.89.E-03               | 0.118                   | 0.343                   | 10.6                    | 0.0774                  | <D.L.                   | 1.92                    |
|            | 1.3-2.1   | <D.L.                   | 0.150                  | 1.33                    | 0.0107                  | 0.0282                  | 0.374                   | 7.56                    | 0.0435                  | <D.L.                   | 0.607                   |
|            | 2.1-4.2   | <D.L.                   | 0.0576                 | 1.16                    | 9.55.E-03               | 0.0163                  | 0.353                   | 3.51                    | 0.0218                  | <D.L.                   | 0.149                   |
|            | 4.2-10.2  | <D.L.                   | 0.0287                 | 1.22                    | 8.81.E-03               | 0.0161                  | 0.151                   | 1.76                    | 9.14.E-03               | <D.L.                   | 0.0122                  |
|            | >10.2     | <D.L.                   | 0.0156                 | 0.526                   | 3.81.E-03               | <D.L.                   | 0.0445                  | 0.57                    | 1.61.E-03               | <D.L.                   | 4.80.E-03               |
| Jun., 2013 | <0.39     | 2.45.E-03               | 0.361                  | 0.534                   | 7.26.E-03               | 0.1112                  | 0.155                   | 2.14                    | 0.0251                  | <D.L.                   | 0.378                   |
|            | 0.39-0.69 | <D.L.                   | 0.477                  | 1.13                    | 0.0104                  | 0.1380                  | 0.223                   | 4.36                    | 0.0371                  | <D.L.                   | 0.683                   |
|            | 0.69-1.3  | <D.L.                   | 0.307                  | 1.09                    | 6.27.E-03               | 0.2240                  | 0.244                   | 4.82                    | 0.0323                  | <D.L.                   | 0.559                   |
|            | 1.3-2.1   | <D.L.                   | 0.156                  | 0.902                   | 4.90.E-03               | 0.118                   | 0.302                   | 4.25                    | 0.0241                  | <D.L.                   | 0.337                   |
|            | 2.1-4.2   | <D.L.                   | 0.0566                 | 0.947                   | 4.03.E-03               | 0.0138                  | 0.339                   | 2.38                    | 0.0208                  | <D.L.                   | 0.204                   |
|            | 4.2-10.2  | <D.L.                   | 0.0277                 | 1.27                    | 6.51.E-03               | 0.0334                  | 0.277                   | 2.04                    | 0.0145                  | <D.L.                   | 0.118                   |
|            | >10.2     | <D.L.                   | 0.0311                 | 1.62                    | 4.91.E-03               | <D.L.                   | 0.208                   | 2.09                    | 0.0092                  | <D.L.                   | 0.100                   |

&lt;D.L.: Below detection limits

Table S5 Continued.

|            | $\mu\text{m}$ | Ti<br>ng/m <sup>3</sup> | V<br>ng/m <sup>3</sup> | Mn<br>ng/m <sup>3</sup> | Co<br>ng/m <sup>3</sup> | Ni<br>ng/m <sup>3</sup> | Cu<br>ng/m <sup>3</sup> | Zn<br>ng/m <sup>3</sup> | Cd<br>ng/m <sup>3</sup> | Sb<br>ng/m <sup>3</sup> | Pb<br>ng/m <sup>3</sup> |
|------------|---------------|-------------------------|------------------------|-------------------------|-------------------------|-------------------------|-------------------------|-------------------------|-------------------------|-------------------------|-------------------------|
| Jul., 2013 | <0.39         | 0.0211                  | 1.25                   | 1.33                    | 0.0264                  | 0.384                   | 0.364                   | 5.12                    | 0.0652                  | 0.114                   | 1.18                    |
|            | 0.39-0.69     | 0.0315                  | 1.45                   | 2.33                    | 0.0209                  | 0.557                   | 0.611                   | 8.76                    | 0.0993                  | 0.154                   | 1.32                    |
|            | 0.69-1.3      | 0.0259                  | 0.534                  | 1.52                    | 0.0130                  | 0.403                   | 0.521                   | 6.50                    | 0.0515                  | 0.0696                  | 0.653                   |
|            | 1.3-2.1       | 0.0161                  | 0.290                  | 1.18                    | 0.0143                  | 0.155                   | 0.750                   | 5.50                    | 0.0369                  | 0.0454                  | 0.451                   |
|            | 2.1-4.2       | 0.0133                  | 0.104                  | 1.02                    | 0.0105                  | 0.099                   | 0.532                   | 2.59                    | 0.0271                  | 0.0255                  | 0.218                   |
|            | 4.2-10.2      | 0.0442                  | 0.0677                 | 1.72                    | 0.0154                  | 0.102                   | 0.436                   | 3.14                    | 0.0283                  | 0.0182                  | 0.102                   |
|            | >10.2         | 0.0114                  | 0.0219                 | 0.863                   | 0.0135                  | 0.143                   | 0.141                   | 1.59                    | 5.20.E-03               | 0.0106                  | 0.0152                  |
| Aug., 2013 | <0.39         | 7.05.E-03               | 1.02                   | 0.855                   | 0.0206                  | 0.279                   | 0.392                   | 5.18                    | 0.0649                  | <D.L.                   | 1.47                    |
|            | 0.39-0.69     | <D.L.                   | 0.727                  | 1.20                    | 0.0124                  | 0.239                   | 0.667                   | 9.13                    | 0.0844                  | <D.L.                   | 1.79                    |
|            | 0.69-1.3      | <D.L.                   | 0.540                  | 1.46                    | 0.0135                  | 0.845                   | 0.880                   | 12.3                    | 0.096                   | <D.L.                   | 1.72                    |
|            | 1.3-2.1       | <D.L.                   | 0.459                  | 2.09                    | 0.0218                  | 0.113                   | 1.28                    | 17.4                    | 0.133                   | <D.L.                   | 1.57                    |
|            | 2.1-4.2       | <D.L.                   | 0.142                  | 1.46                    | 0.0192                  | 0.0399                  | 0.809                   | 5.21                    | 0.0515                  | <D.L.                   | 0.44                    |
|            | 4.2-10.2      | <D.L.                   | 0.0761                 | 2.16                    | 0.0269                  | 0.0543                  | 0.610                   | 3.82                    | 0.0314                  | <D.L.                   | 0.132                   |
|            | >10.2         | <D.L.                   | 0.0726                 | 2.51                    | 0.0129                  | <D.L.                   | 0.340                   | 3.42                    | 0.0197                  | <D.L.                   | 0.0570                  |
| Sep., 2013 | <0.39         | 0.0558                  | 1.80                   | 4.40                    | 0.0194                  | 0.623                   | 1.15                    | 22.3                    | 0.365                   | 0.492                   | 5.27                    |
|            | 0.39-0.69     | 0.0316                  | 0.405                  | 2.94                    | 5.99.E-03               | 0.147                   | 0.555                   | 11.1                    | 0.135                   | 0.146                   | 1.81                    |
|            | 0.69-1.3      | 0.0232                  | 0.265                  | 3.24                    | 7.73.E-03               | 0.0837                  | 0.575                   | 13.1                    | 0.176                   | 0.169                   | 2.08                    |
|            | 1.3-2.1       | 0.0188                  | 0.166                  | 2.24                    | 0.0114                  | 0.0577                  | 1.00                    | 9.77                    | 0.236                   | 0.208                   | 2.10                    |
|            | 2.1-4.2       | 0.0229                  | 0.106                  | 2.55                    | 0.0178                  | 0.0758                  | 1.34                    | 6.21                    | 0.247                   | 0.205                   | 2.13                    |
|            | 4.2-10.2      | 9.06.E-03               | 0.0449                 | 2.87                    | 0.0145                  | 0.0530                  | 0.757                   | 4.15                    | 0.197                   | 0.111                   | 1.15                    |
|            | >10.2         | 6.88.E-03               | 0.0219                 | 1.58                    | 6.52.E-03               | 0.0452                  | 0.176                   | 2.69                    | 0.0492                  | 0.0249                  | 0.146                   |
| Oct., 2013 | <0.39         | 5.97.E-03               | 0.450                  | 0.951                   | 6.30.E-03               | 0.138                   | 0.378                   | 6.87                    | 0.099                   | 0.224                   | 1.60                    |
|            | 0.39-0.69     | 4.28.E-03               | 0.0866                 | 0.495                   | 2.04.E-03               | 7.25.E-03               | 0.105                   | 2.40                    | 0.0241                  | 0.0549                  | 0.544                   |
|            | 0.69-1.3      | 0.0118                  | 0.0622                 | 0.704                   | 2.78.E-03               | 0.163                   | 0.220                   | 3.87                    | 0.0274                  | 0.0569                  | 0.542                   |
|            | 1.3-2.1       | 6.46.E-03               | 0.0295                 | 0.576                   | 3.19.E-03               | 4.29.E-03               | 0.343                   | 3.04                    | 0.0165                  | 0.0384                  | 0.231                   |
|            | 2.1-4.2       | 0.0061                  | 0.0182                 | 0.599                   | 3.07.E-03               | 8.15.E-03               | 0.376                   | 1.49                    | 9.90.E-03               | 0.0325                  | 0.109                   |
|            | 4.2-10.2      | 0.0134                  | 0.0200                 | 1.16                    | 4.63.E-03               | 0.0234                  | 0.544                   | 1.85                    | 0.0124                  | 0.0389                  | 0.114                   |
|            | >10.2         | 4.43.E-03               | 7.32.E-03              | 0.418                   | 1.40.E-03               | 0.0132                  | 0.123                   | 0.900                   | 2.14.E-03               | 9.04.E-03               | 0.0371                  |
| Nov., 2013 | <0.39         | 9.07.E-03               | 1.11                   | 1.86                    | 0.0312                  | 0.406                   | 0.555                   | 11.8                    | 0.138                   | 0.286                   | 3.10                    |
|            | 0.39-0.69     | 7.66.E-03               | 0.266                  | 1.34                    | 6.75.E-03               | 0.0780                  | 0.237                   | 6.24                    | 0.0616                  | 0.099                   | 1.45                    |
|            | 0.69-1.3      | 0.0138                  | 0.145                  | 1.61                    | 7.67.E-03               | 0.0825                  | 0.391                   | 8.76                    | 0.0635                  | 0.0937                  | 1.33                    |
|            | 1.3-2.1       | 8.02.E-03               | 0.0653                 | 1.17                    | 7.66.E-03               | 0.0230                  | 0.494                   | 5.55                    | 0.0455                  | 0.0680                  | 0.517                   |
|            | 2.1-4.2       | 9.57.E-03               | 0.0340                 | 1.17                    | 0.0122                  | 0.0281                  | 0.761                   | 3.45                    | 0.0261                  | 0.0677                  | 0.223                   |
|            | 4.2-10.2      | 7.21.E-03               | 0.0199                 | 0.951                   | 0.0112                  | 0.0242                  | 0.502                   | 2.74                    | 0.0173                  | 0.0352                  | 0.129                   |
|            | >10.2         | 1.74.E-03               | 0.0153                 | 0.396                   | 6.61.E-03               | 4.97.E-03               | 0.144                   | 2.05                    | 6.63.E-03               | 0.0179                  | 0.0625                  |
| Dec., 2013 | <0.39         | 0.0110                  | 0.438                  | 1.19                    | 0.0240                  | 0.172                   | 0.505                   | 10.7                    | 0.112                   | 0.291                   | 2.63                    |
|            | 0.39-0.69     | 6.29.E-03               | 0.117                  | 0.832                   | 7.66.E-03               | 0.0433                  | 0.236                   | 5.33                    | 0.0690                  | 0.126                   | 1.47                    |
|            | 0.69-1.3      | 0.0125                  | 0.0766                 | 1.17                    | 0.0119                  | 0.0360                  | 0.358                   | 6.71                    | 0.0744                  | 0.105                   | 0.815                   |
|            | 1.3-2.1       | 8.91.E-03               | 0.0396                 | 0.837                   | 0.0058                  | 0.0157                  | 0.520                   | 5.23                    | 0.0392                  | 0.0703                  | 0.513                   |
|            | 2.1-4.2       | 5.98.E-03               | 0.0186                 | 0.524                   | 0.0060                  | 0.0053                  | 0.468                   | 2.35                    | 0.0159                  | 0.0489                  | 0.154                   |
|            | 4.2-10.2      | 8.78.E-03               | 0.0152                 | 0.725                   | 0.0083                  | 0.0255                  | 0.473                   | 2.51                    | 0.0123                  | 0.0366                  | 0.0619                  |
|            | >10.2         | <D.L.                   | 0.0101                 | 0.359                   | 3.97.E-03               | 0.0138                  | 0.105                   | 1.78                    | 6.05.E-03               | 0.0107                  | 0.0316                  |
| Haze       | <0.39         | 7.27.E-03               | 1.12                   | 2.40                    | 0.0467                  | 0.783                   | 1.07                    | 13.1                    | 0.271                   | 0.372                   | 1.66                    |
|            | 0.39-0.69     | 0.581                   | 2.09                   | 13.0                    | 0.0873                  | 1.41                    | 2.02                    | 47.3                    | 0.887                   | 0.892                   | 9.49                    |
|            | 0.69-1.3      | 0.0403                  | 0.888                  | 10.8                    | 0.0661                  | 0.912                   | 2.14                    | 41.4                    | 0.456                   | 0.775                   | 7.16                    |
|            | 1.3-2.1       | 0.0249                  | 0.376                  | 6.58                    | 0.0719                  | 0.753                   | 3.02                    | 27.7                    | 0.300                   | 0.898                   | 2.87                    |
|            | 2.1-4.2       | <D.L.                   | 0.0974                 | 2.68                    | 0.0367                  | 0.497                   | 2.34                    | 9.92                    | 0.0915                  | 0.622                   | 0.703                   |
|            | 4.2-10.2      | 0.152                   | 0.0868                 | 4.16                    | 0.0642                  | 0.532                   | 3.29                    | 14.3                    | 0.0979                  | 0.375                   | 0.578                   |
|            | >10.2         | <D.L.                   | <D.L.                  | 2.67                    | 0.0571                  | 0.416                   | 0.928                   | 11.2                    | 8.77.E-03               | 0.110                   | 0.241                   |
| Asian dust | <0.39         | 0.0967                  | 3.26                   | 5.00                    | 0.0724                  | 1.21                    | 2.33                    | 28.8                    | 0.481                   | 0.511                   | 5.83                    |
|            | 0.39-0.69     | 0.0649                  | 1.13                   | 6.90                    | 0.0489                  | 0.674                   | 2.10                    | 34.4                    | 0.369                   | 0.456                   | 5.44                    |
|            | 0.69-1.3      | 0.0782                  | 0.710                  | 6.75                    | 0.0411                  | 0.339                   | 1.52                    | 31.4                    | 0.366                   | 0.240                   | 4.29                    |
|            | 1.3-2.1       | 0.102                   | 0.318                  | 7.05                    | 0.0609                  | 0.423                   | 1.23                    | 23.0                    | 0.201                   | 0.136                   | 0.788                   |
|            | 2.1-4.2       | 0.0357                  | 0.194                  | 9.07                    | 0.0603                  | 0.254                   | 0.893                   | 10.2                    | 0.0830                  | 0.0688                  | 0.0861                  |
|            | 4.2-10.2      | 0.0326                  | 0.105                  | 6.16                    | 0.0501                  | 0.150                   | 0.477                   | 48.9                    | 0.0157                  | 0.0351                  | 0.0388                  |
|            | >10.2         | 0.0117                  | 0.0254                 | 1.40                    | 9.94.E-03               | 0.0920                  | 0.104                   | 1.55                    | 3.4.E-03                | 9.04.E-03               | 0.0143                  |

&lt;D.L.: Below detection limits

## References

- Bray, A. W., Oelkers, E. H., Bonneville, S., Wolff-Boenisch, D., Potts, N. J., Fones, G., and Benning, L. G.: The effect of pH, grain size, and organic ligands on biotite weathering rates, *Geochim. Cosmochim. Acta*, 164, 127–145, <http://dx.doi.org/10.1016/j.gca.2015.04.048>, 2015.
- Desboeufs, K. V., Losno, R., Colin, J. L.: Factors influencing aerosol solubility during cloud processes, *Atmos. Environ.*, 35, 3529–3537, [https://doi.org/10.1016/S1352-2310\(00\)00472-6](https://doi.org/10.1016/S1352-2310(00)00472-6), 2001.
- Kodama, H., Schnitzer, M.: Dissolution of chlorite minerals by fulvic acid, *Can. J. Soil Sci.*, 53, 240–243, <https://doi.org/10.4141/cjss73-036>, 1973.
- Lowson, R. T., Comarmond, J., Rajaratnam, G., Brown, P. L.: The kinetics of the dissolution of chlorite as a function of pH and at 25°C, *Geochim. Cosmochim. Acta*, 69, 1687–1699, <https://doi.org/10.1016/j.gca.2004.09.028>, 2005.
